# Supplementary material
Source: Copernicus journal article supplement (doi:10.5194/egusphere-2026-1868)
Supplement: Supplementary file 1 [file egusphere-2026-1868-supplement.pdf]

# Supporting Information:

## Comprehensive Treatment of C<sub>4</sub>-C<sub>6</sub> Alkanes and Their Oxidation Products in CAM-chem: The MOZART-T3 Mechanism

5 Duseong S. Jo<sup>1\*</sup>, John J. Orlando<sup>2</sup>, Rebecca H. Schwantes<sup>3</sup>, Louisa K. Emmons<sup>2</sup>, Rebecca S. Hornbrook<sup>2</sup>,  
Eric C. Apel<sup>2</sup>, Alan J. Hills<sup>2</sup>, Kirk Ullmann<sup>2</sup>, L. Gregory Huey<sup>4</sup>, Claire Granier<sup>3,5,6</sup>, Chelsea R. Thompson<sup>3</sup>,  
and Jeff Peischl<sup>3</sup>

<sup>1</sup>Department of Earth Science Education, Seoul National University, Seoul, 08826, South Korea

10 <sup>2</sup>Atmospheric Chemistry Observations & Modeling Laboratory, NSF National Center for Atmospheric Research, Boulder, CO,  
80301, USA

<sup>3</sup>Chemical Sciences Laboratory, National Oceanic and Atmospheric Administration, Boulder, CO, 80305, USA

<sup>4</sup>School of Earth and Atmospheric Sciences, Georgia Institute of Technology, Atlanta, GA, 30332, USA

<sup>5</sup>Laboratoire d'Aerologie, University of Toulouse, CNRS, UPS, Toulouse, France

15 <sup>6</sup>Cooperative Institute for Research in Environmental Sciences (CIRES), University of Colorado, Boulder, CO 80309, USA

20 *Correspondence to:* Duseong S. Jo (duseong@snu.ac.kr)

**Table S1.** Kinetic reactions added in MOZART-T3 mechanism. Mechanism label denotes the reaction tag used in CAM-chem reaction files. Details can be found in Sect. 2.

| Mechanism label  | Reactants        |   | Products                                                               | Rate                                  | Reference                          |
|------------------|------------------|---|------------------------------------------------------------------------|---------------------------------------|------------------------------------|
| C <sub>1</sub>   |                  |   |                                                                        |                                       |                                    |
| CH3O2_NO3        | CH3O2 + NO3      | → | CH2O + NO2 + HO2                                                       | 8.90E-12 exp(-600/T)                  | Jenkin et al. (2019)               |
| C <sub>2</sub>   |                  |   |                                                                        |                                       |                                    |
| usr_C2H5O2_NOa   | C2H5O2 + NO      | → | CH3CHO + HO2 + NO2                                                     | 2.60E-12 exp(365/T) * (1 - $\alpha$ ) | JPL19; Jenkin et al. (2019)        |
| usr_C2H5O2_NOon  | C2H5O2 + NO      | → | ALKNIT                                                                 | 2.60E-12 exp(365/T) * $\alpha$        | JPL19; Jenkin et al. (2019)        |
| C2H5O2_NO3       | C2H5O2 + NO3     | → | CH3CHO + NO2 + HO2                                                     | 8.90E-12 exp(-390/T)                  | Jenkin et al. (2019)               |
| CH3CO3_NO3       | CH3CO3 + NO3     | → | CH3O2 + CO2 + NO2                                                      | 8.90E-12 exp(-305/T)                  | Jenkin et al. (2019)               |
| CH3CO3_HO2a      | CH3CO3 + HO2     | → | CH3COOOH                                                               | 1.50E-12 exp(480/T)                   | IUPAC                              |
| CH3CO3_HO2b      | CH3CO3 + HO2     | → | CH3COOH + O3                                                           | 4.40E-15 exp(1910/T)                  | IUPAC                              |
| CH3CO3_HO2c      | CH3CO3 + HO2     | → | CH3O2 + CO2 + OH                                                       | 4.66E-12 exp(235/T)                   | IUPAC                              |
| C <sub>3</sub>   |                  |   |                                                                        |                                       |                                    |
| C3H8_OH_N        | C3H8 + OH        | → | NC3H7O2 + H2O                                                          | 1.06E-11 exp(-1071/T)                 | IUPAC; Droege and Tully (1986)     |
| C3H8_OH_I        | C3H8 + OH        | → | IC3H7O2 + H2O                                                          | 3.40E-12 exp(-442/T)                  | IUPAC; Droege and Tully (1986)     |
| usr_NC3H7O2_NOa  | NC3H7O2 + NO     | → | PROPANAL + NO2 + HO2                                                   | 2.70E-12 exp(360/T) * (1 - $\alpha$ ) | Jenkin et al. (2019)               |
| usr_NC3H7O2_NOon | NC3H7O2 + NO     | → | ALKNIT                                                                 | 2.70E-12 exp(360/T) * $\alpha$        | Jenkin et al. (2019)               |
| usr_IC3H7O2_NOa  | IC3H7O2 + NO     | → | CH3COCH3 + NO2 + HO2                                                   | 2.70E-12 exp(360/T) * (1 - $\alpha$ ) | Jenkin et al. (2019)               |
| usr_IC3H7O2_NOon | IC3H7O2 + NO     | → | ALKNIT                                                                 | 2.70E-12 exp(360/T) * $\alpha$        | Jenkin et al. (2019)               |
| NC3H7O2_HO2      | NC3H7O2 + HO2    | → | NC3H7OOH                                                               | 1.41E-13 exp(1300/T)                  | Wennberg et al. (2018)             |
| IC3H7O2_HO2      | IC3H7O2 + HO2    | → | IC3H7OOH                                                               | 1.41E-13 exp(1300/T)                  | Wennberg et al. (2018)             |
| NC3H7O2_CH3O2    | NC3H7O2 + CH3O2  | → | 0.80*CH2O + 0.80*PROPANAL +<br>0.20*PROPANOL + 1.2*HO2 +<br>0.20*CH3OH | 1.00E-13 exp(557/T)                   | IUPAC; Jenkin et al. (2019)        |
| IC3H7O2_CH3O2    | IC3H7O2 + CH3O2  | → | PROPANAL + HO2 + CH3O2 + CO2                                           | 100E-13 exp(-293/T)                   | IUPAC; Jenkin et al. (2019)        |
| NC3H7O2_CH3CO3   | NC3H7O2 + CH3CO3 | → | 0.80*CH2O + 0.80*PROPANAL +<br>0.20*PROPANOL + 1.2*HO2 +<br>0.20*CH3OH | 4.4E-13 exp(1070/T)                   | IUPAC<br>(Same as C2H5O2 + CH3CO3) |
| IC3H7O2_CH3CO3   | IC3H7O2 + CH3CO3 | → | CH3COCH3 + HO2 + CH3O2 + CO2                                           | 4.4E-13 exp(1070/T)                   | IUPAC<br>(Same as C2H5O2 + CH3CO3) |
| NC3H7O2_NO3      | NC3H7O2 + NO3    | → | PROPANAL + NO2 + HO2                                                   | 8.90E-12 exp(-390/T)                  | Jenkin et al. (2019)               |
| IC3H7O2_NO3      | IC3H7O2 + NO3    | → | CH3COCH3 + NO2 + HO2                                                   | 8.90E-12 exp(-390/T)                  | Jenkin et al. (2019)               |
| NC3H7OOH_OH      | NC3H7OOH + OH    | → | H2O + NC3H7O2                                                          | 1.90E-12 exp(190/T)                   | MCMv3.3.1                          |
| NC3H7OOH_OH_C    | NC3H7OOH + OH    | → | H2O + PROPANAL + OH                                                    | 1.10E-11                              | MCMv3.3.1                          |
| IC3H7OOH_OH      | IC3H7OOH + OH    | → | H2O + IC3H7O2                                                          | 1.90E-12 exp(190/T)                   | MCMv3.3.1                          |

|                 |                   |   |                           |                                 |                                 |
|-----------------|-------------------|---|---------------------------|---------------------------------|---------------------------------|
| IC3H7OOH_OH_C   | IC3H7OOH + OH     | → | H2O + CH3COCH3 + OH       | 1.66E-11                        | MCMv3.3.1                       |
| PROPANAL_OH     | PROPANAL + OH     | → | C2H5CO3 + H2O             | 4.80E-12 exp(405/T)             | Calvert et al. (2015)           |
| PROPANOL_OH     | PROPANOL + OH     | → | PROPANAL + HO2 + H2O      | 4.60E-12 exp(70/T)              | IUPAC                           |
| IPROPANOL_OH    | IPROPANOL + OH    | → | CH3COCH3 + HO2 + H2O      | 2.60E-12 exp(200/T)             | IUPAC                           |
| tag_C2H5CO3_NO2 | C2H5CO3 + NO2 + M | → | PPN + M                   | 9.6e-28, 8.9, 7.7e-12, 0.2, 0.6 | JPL19                           |
| usr_PPN_M       | PPN + M           | → | C2H5CO3 + NO2 + M         | 9.0e-29 exp(14000/T)            | JPL19                           |
| C2H5CO3_HO2a    | C2H5CO3 + HO2     | → | CH3COOOH                  | 1.50E-12 exp(480/T)             | IUPAC (same as CH3CO3 + HO2)    |
| C2H5CO3_HO2b    | C2H5CO3 + HO2     | → | CH3COOH + O3              | 4.40E-15 exp(1910/T)            | IUPAC (same as CH3CO3 + HO2)    |
| C2H5CO3_HO2c    | C2H5CO3 + HO2     | → | C2H5O2 + CO2 + OH         | 4.66E-12 exp(235/T)             | IUPAC (same as CH3CO3 + HO2)    |
| C2H5CO3_NO      | C2H5CO3 + NO      | → | C2H5O2 + NO2 + CO2        | 6.70E-12 exp(340/T)             | IUPAC for C2H5CO3               |
| C2H5CO3_CH3O2   | C2H5CO3 + CH3O2   | → | C2H5O2 + HO2 + CH2O + CO2 | 2.00E-12 exp(500/T)             | JPL19 (Same as CH3CO3 + CH3O2)  |
| C2H5CO3_CH3CO3  | C2H5CO3 + CH3CO3  | → | C2H5O2 + CH3O2 + 2*CO2    | 2.90E-12 exp(500/T)             | JPL19 (Same as CH3CO3 + CH3CO3) |
| C2H5CO3_NO3     | C2H5CO3 + NO3     | → | C2H5O2 + CO2 + NO2        | 8.90E-12 exp(-305/T)            | Jenkin et al. (2019)            |

C<sub>4</sub>

|                 |                 |   |                                             |                                       |                                                          |
|-----------------|-----------------|---|---------------------------------------------|---------------------------------------|----------------------------------------------------------|
| NBUTANE_OH_N    | NBUTANE + OH    | → | NBUPO2 + H2O                                | 6.89E-12 exp(-893/T)                  | IUPAC; Droege and Tully (1986)                           |
| NBUTANE_OH_I    | NBUTANE + OH    | → | NBUO2 + H2O                                 | 6.76E-12 exp(-362/T)                  | IUPAC; Droege and Tully (1986)                           |
| ISOBUTANE_OH    | ISOBUTANE + OH  | → | TBUO2 + H2O                                 | 7.00E-12 exp(-350/T)                  | Calvert et al. (2008)                                    |
| NBUPO2_HO2      | NBUPO2 + HO2    | → | NBUPOOH                                     | 1.70E-13 exp(1300/T)                  | Wennberg et al. (2018)                                   |
| NBUO2_HO2       | NBUO2 + HO2     | → | NBUOOH                                      | 1.70E-13 exp(1300/T)                  | Wennberg et al. (2018)                                   |
| TBUO2_HO2       | TBUO2 + HO2     | → | TBUOOH                                      | 1.70E-13 exp(1300/T)                  | Wennberg et al. (2018)                                   |
| usr_NBUPO2_NOa  | NBUPO2 + NO     | → | NBUPO + NO2                                 | 2.70E-12 exp(360/T) * (1 - $\alpha$ ) | Jenkin et al. (2019)                                     |
| usr_NBUPO2_NOOn | NBUPO2 + NO     | → | ALKNIT                                      | 2.70E-12 exp(360/T) * $\alpha$        | Jenkin et al. (2019)                                     |
| usr_NBUO2_NOa   | NBUO2 + NO      | → | NBUO + NO2                                  | 2.70E-12 exp(360/T) * (1 - $\alpha$ ) | Jenkin et al. (2019)                                     |
| usr_NBUO2_NOOn  | NBUO2 + NO      | → | ALKNIT                                      | 2.70E-12 exp(360/T) * $\alpha$        | Jenkin et al. (2019)                                     |
| usr_TBUO2_NOa   | TBUO2 + NO      | → | CH3O2 + CH3COCH3 + NO2                      | 2.70E-12 exp(360/T) * (1 - $\alpha$ ) | Jenkin et al. (2019)                                     |
| usr_TBUO2_NOOn  | TBUO2 + NO      | → | ALKNIT                                      | 2.70E-12 exp(360/T) * $\alpha$        | Jenkin et al. (2019)                                     |
| NBUPO2_CH3O2    | NBUPO2 + CH3O2  | → | NBUPO + CH2O + HO2                          | 6E-14 exp(600/T)                      | IUPAC; Glover and Miller (2005);<br>Jenkin et al. (2019) |
| NBUPO2_CH3O2_2  | NBUPO2 + CH3O2  | → | BUTANAL + 0.5*CH3OH + 0.5*CH2O              | 4E-14 exp(600/T)                      | IUPAC; Glover and Miller (2005);<br>Jenkin et al. (2019) |
| NBUO2_CH3O2     | NBUO2 + CH3O2   | → | NBUO + CH2O + HO2                           | 6E-14 exp(340/T)                      | IUPAC; Glover and Miller (2005);<br>Jenkin et al. (2019) |
| NBUO2_CH3O2_2   | NBUO2 + CH3O2   | → | 0.5*BUTOL2 + 0.5*MEK + 0.5*CH3OH + 0.5*CH2O | 4E-14 exp(340/T)                      | IUPAC; Glover and Miller (2005);<br>Jenkin et al. (2019) |
| TBUO2_CH3O2     | TBUO2 + CH3O2   | → | CH3O2 + CH3COCH3 + CH2O + HO2               | 3.04E-13 exp(-1430/T)                 | IUPAC; Jenkin et al. (2019)                              |
| TBUO2_CH3O2_2   | TBUO2 + CH3O2   | → | TBUOH + CH2O                                | 7.60E-14 exp(-1430/T)                 | IUPAC; Jenkin et al. (2019)                              |
| NBUPO2_CH3CO3   | NBUPO2 + CH3CO3 | → | NBUPO + CH3O2 + CO2                         | 4.4E-13 exp(1070/T)                   | IUPAC<br>(Same as C2H5O2 + CH3CO3)                       |
| NBUO2_CH3CO3    | NBUO2 + CH3CO3  | → | NBUO + CH3O2 + CO2                          | 4.4E-13 exp(1070/T)                   | IUPAC<br>(Same as C2H5O2 + CH3CO3)                       |

|                   |                   |   |                                  |                                           |                                                      |
|-------------------|-------------------|---|----------------------------------|-------------------------------------------|------------------------------------------------------|
| TBUO2_CH3CO3      | TBUO2 + CH3CO3    | → | 2*CH3O2 + CH3COCH3 + CO2         | 4.4E-13 exp(1070/T)                       | IUPAC<br>(Same as C2H5O2 + CH3CO3)                   |
| NBUPO2_NO3        | NBUPO2 + NO3      | → | NBUPO + NO2                      | 8.90E-12 exp(-390/T)                      | Jenkin et al. (2019)                                 |
| NBUO2_NO3         | NBUO2 + NO3       | → | NBUO + NO2                       | 8.90E-12 exp(-390/T)                      | Jenkin et al. (2019)                                 |
| TBUO2_NO3         | TBUO2 + NO3       | → | CH3O2 + CH3COCH3 + NO2           | 8.90E-12 exp(-390/T)                      | Jenkin et al. (2019)                                 |
| NBUPO_O2          | NBUPO + O2        | → | BUTANAL + HO2                    | 2.50E-14 exp(-300/T)                      | Atkinson (2007)                                      |
| NBUO_O2           | NBUO + O2         | → | MEK + HO2                        | 2.50E-14 exp(-300/T)                      | Atkinson (2007)                                      |
| NBUPO_I           | NBUPO             | → | NBUPOHO2                         | 1.20E+11 exp(-3825/T)                     | Atkinson (2007)                                      |
| usr_NBUO          | NBUO              | → | CH3CHO + C2H5O2                  | 1.12E+9 T <sup>(1.7)</sup> exp(-6139.3/T) | Vereecken and Peeters (2009)                         |
| NBUPOHO2_HO2      | NBUPOHO2 + HO2    | → | NBUPOOH                          | 1.93E-13 exp(1300/T)                      | Wennberg et al. (2018)                               |
| usr_NBUPOHO2_NOa  | NBUPOHO2 + NO     | → | OHBUTANAL + HO2 + NO2            | 2.70E-12 exp(360/T) * (1 - $\alpha$ )     | Jenkin et al. (2019)                                 |
| usr_NBUPOHO2_NOon | NBUPOHO2 + NO     | → | ALKNIT                           | 2.70E-12 exp(360/T) * $\alpha$            | Jenkin et al. (2019)                                 |
| NBUPOHO2_CH3O2    | NBUPOHO2 + CH3O2  | → | OHBUTANAL + 2*HO2 + CH2O         | 6E-14 exp(600/T)                          | Same as NBUPO2                                       |
| NBUPOHO2_CH3O2_2  | NBUPOHO2 + CH3O2  | → | OHBUTANAL + 0.5*CH3OH + 0.5*CH2O | 4E-14 exp(600/T)                          | Same as NBUPO2                                       |
| NBUPOHO2_CH3CO3   | NBUPOHO2 + CH3CO3 | → | OHBUTANAL + HO2 + CH3O2 + CO2    | 4.4E-13 exp(1070/T)                       | IUPAC<br>(Same as C2H5O2 + CH3CO3)                   |
| NBUPOHO2_NO3      | NBUPOHO2 + NO3    | → | OHBUTANAL + HO2 + NO2            | 8.90E-12 exp(-390/T)                      | Jenkin et al. (2019)                                 |
| NBUPOOH_OH        | NBUPOOH + OH      | → | NBUPO2 + H2O                     | 1.90E-12 exp(190/T)                       | MCMv3.3.1                                            |
| NBUPOOH_OH_C      | NBUPOOH + OH      | → | BUTANAL + H2O + OH               | 1.24E-11                                  | MCMv3.3.1                                            |
| NBUOOH_OH         | NBUOOH + OH       | → | NBUO2 + H2O                      | 1.90E-12 exp(190/T)                       | MCMv3.3.1                                            |
| NBUOOH_OH_C       | NBUOOH + OH       | → | MEK + H2O + OH                   | 2.15E-11                                  | MCMv3.3.1                                            |
| TBUOOH_OH         | TBUOOH + OH       | → | TBUO2 + H2O                      | 7.00E-13 exp(485/T)                       | Baasandorj et al. (2010)                             |
| BUTANAL_OH        | BUTANAL + OH      | → | NC3H7O2 + CO2                    | 5.97E-12 exp(411/T)                       | Calvert et al. (2015)                                |
| OHBUTANAL_OH      | OHBUTANAL + OH    | → | NC3H7O2 + CO2                    | 2.95E-11                                  | Calvert et al. (2015)<br>(Same as 3-hydroxy butanal) |
| BUTOL2_OH         | BUTOL2 + OH       | → | MEK + HO2 + H2O                  | 2.70E-12 exp(329/T)                       | Calvert et al. (2015)                                |
| TBUOH_OH          | TBUOH + OH        | → | CH3COCH3 + CH2O + HO2 + H2O      | 1.60E-12 exp(-124/T)                      | Calvert et al. (2015)                                |
| C <sub>5</sub>    |                   |   |                                  |                                           |                                                      |
| NPENTANE_OH_A     | NPENTANE + OH     | → | NPENTO2A + H2O                   | 7.40E-12 exp(-452/T)                      | Calvert et al. (2015)                                |
| NPENTANE_OH_B     | NPENTANE + OH     | → | NPENTO2B + H2O                   | 1.07E-11 exp(-452/T)                      | Calvert et al. (2015)                                |
| IPENTANE_OH_A     | IPENTANE + OH     | → | IPENTO2A + H2O                   | 6.45E-12 exp(-296/T)                      | Calvert et al. (2015)                                |
| IPENTANE_OH_B     | IPENTANE + OH     | → | IPENTO2B + H2O                   | 3.65E-12 exp(-296/T)                      | Calvert et al. (2015)                                |
| NPENTO2A_HO2      | NPENTO2A + HO2    | → | NPENTOOHA                        | 1.93E-13 exp(1300/T)                      | Wennberg et al. (2018)                               |
| NPENTO2B_HO2      | NPENTO2B + HO2    | → | NPENTOOHB                        | 1.93E-13 exp(1300/T)                      | Wennberg et al. (2018)                               |
| IPENTO2A_HO2      | IPENTO2A + HO2    | → | IPENTOOHA                        | 1.93E-13 exp(1300/T)                      | Wennberg et al. (2018)                               |
| IPENTO2B_HO2      | IPENTO2B + HO2    | → | IPENTOOHB                        | 1.93E-13 exp(1300/T)                      | Wennberg et al. (2018)                               |
| usr_NPENTO2A_NOa  | NPENTO2A + NO     | → | NPENTOA + NO2                    | 2.70E-12 exp(360/T) * (1 - $\alpha$ )     | Jenkin et al. (2019)                                 |
| usr_NPENTO2A_NOon | NPENTO2A + NO     | → | ALKNIT                           | 2.70E-12 exp(360/T) * $\alpha$            | Jenkin et al. (2019)                                 |

|                   |                   |                                                           |                                       |                                                               |
|-------------------|-------------------|-----------------------------------------------------------|---------------------------------------|---------------------------------------------------------------|
| usr_NPENTO2B_NOa  | NPENTO2B + NO     | → NPENTOB + NO2                                           | $2.70E-12 \exp(360/T) * (1 - \alpha)$ | Jenkin et al. (2019)                                          |
| usr_NPENTO2B_NOon | NPENTO2B + NO     | → ALKNIT                                                  | $2.70E-12 \exp(360/T) * \alpha$       | Jenkin et al. (2019)                                          |
| usr_IPENTO2A_NOa  | IPENTO2A + NO     | → CH3COCH3 + C2H5O2 + NO2                                 | $2.70E-12 \exp(360/T) * (1 - \alpha)$ | Jenkin et al. (2019)                                          |
| usr_IPENTO2A_NOon | IPENTO2A + NO     | → ALKNIT                                                  | $2.70E-12 \exp(360/T) * \alpha$       | Jenkin et al. (2019)                                          |
| usr_IPENTO2B_NOa  | IPENTO2B + NO     | → IPENTOB + NO2                                           | $2.70E-12 \exp(360/T) * (1 - \alpha)$ | Jenkin et al. (2019)                                          |
| usr_IPENTO2B_NOon | IPENTO2B + NO     | → ALKNIT                                                  | $2.70E-12 \exp(360/T) * \alpha$       | Jenkin et al. (2019)                                          |
| NPENTO2A_CH3O2    | NPENTO2A + CH3O2  | → NPENTOA + CH2O + HO2                                    | $6E-14 \exp(228/T)$                   | IUPAC; Jenkin et al. (2019)                                   |
| NPENTO2A_CH3O2_2  | NPENTO2A + CH3O2  | → $0.5*CH3OH + 0.5*CH2O + 0.5*PENTANONE3 + 0.5*PENTANOL3$ | $4E-14 \exp(228/T)$                   | IUPAC; Jenkin et al. (2019)                                   |
| NPENTO2B_CH3O2    | NPENTO2B + CH3O2  | → NPENTOB + CH2O + HO2                                    | $6E-14 \exp(228/T)$                   | IUPAC; Jenkin et al. (2019)                                   |
| NPENTO2B_CH3O2_2  | NPENTO2B + CH3O2  | → $0.5*CH3OH + 0.5*CH2O + 0.5*PENTANONE2 + 0.5*PENTANOL2$ | $4E-14 \exp(228/T)$                   | IUPAC; Jenkin et al. (2019)                                   |
| IPENTO2A_CH3O2    | IPENTO2A + CH3O2  | → CH3COCH3 + C2H5O2 + CH2O + HO2                          | $3.04E-13 \exp(-1430/T)$              | Same as TBUO2 + CH3O2                                         |
| IPENTO2A_CH3O2_2  | IPENTO2A + CH3O2  | → IPENTOL + CH2O                                          | $7.60E-14 \exp(-1430/T)$              | Same as TBUO2 + CH3O2                                         |
| IPENTO2B_CH3O2    | IPENTO2B + CH3O2  | → IPENTOB + CH2O + HO2                                    | $6E-14 \exp(228/T)$                   | IUPAC (CH3O2 self);<br>Jenkin et al. (2019) (sec-C4H9O2 self) |
| IPENTO2B_CH3O2_2  | IPENTO2B + CH3O2  | → $0.5*CH3OH + 0.5*CH2O + 0.5*M2BUTOL + 0.5*NELSON$       | $4E-14 \exp(228/T)$                   | IUPAC (CH3O2 self);<br>Jenkin et al. (2019) (sec-C4H9O2 self) |
| NPENTO2A_CH3CO3   | NPENTO2A + CH3CO3 | → NPENTOA + CH3O2 + CO2                                   | $4.4E-13 \exp(1070/T)$                | IUPAC<br>(Same as C2H5O2 + CH3CO3)                            |
| NPENTO2B_CH3CO3   | NPENTO2B + CH3CO3 | → NPENTOB + CH3O2 + CO2                                   | $4.4E-13 \exp(1070/T)$                | IUPAC<br>(Same as C2H5O2 + CH3CO3)                            |
| IPENTO2A_CH3CO3   | IPENTO2A + CH3CO3 | → CH3COCH3 + C2H5O2 + CH3O2 + CO2                         | $4.4E-13 \exp(1070/T)$                | IUPAC<br>(Same as C2H5O2 + CH3CO3)                            |
| IPENTO2B_CH3CO3   | IPENTO2B + CH3CO3 | → NPENTOB + CH3O2 + CO2                                   | $4.4E-13 \exp(1070/T)$                | IUPAC<br>(Same as C2H5O2 + CH3CO3)                            |
| NPENTO2A_NO3      | NPENTO2A + NO3    | → NPENTOA + NO2                                           | $8.90E-12 \exp(-390/T)$               | Jenkin et al. (2019)                                          |
| NPENTO2B_NO3      | NPENTO2B + NO3    | → NPENTOB + NO2                                           | $8.90E-12 \exp(-390/T)$               | Jenkin et al. (2019)                                          |
| IPENTO2A_NO3      | IPENTO2A + NO3    | → CH3COCH3 + C2H5O2 + NO2                                 | $8.90E-12 \exp(-390/T)$               | Jenkin et al. (2019)                                          |
| IPENTO2B_NO3      | IPENTO2B + NO3    | → IPENTOB + NO2                                           | $8.90E-12 \exp(-390/T)$               | Jenkin et al. (2019)                                          |
| NPENTOA_O2        | NPENTOA + O2      | → PENTANONE3 + HO2                                        | $2.50E-14 \exp(-300/T)$               | Atkinson (2007)                                               |
| NPENTOB_O2        | NPENTOB + O2      | → PENTANONE2 + HO2                                        | $2.50E-14 \exp(-300/T)$               | Atkinson (2007)                                               |
| IPENTOB_O2        | IPENTOB + O2      | → NELSON + HO2                                            | $2.50E-14 \exp(-300/T)$               | Atkinson (2007)                                               |
| usr_NPENTOA       | NPENTOA           | → PROPANAL + C2H5O2                                       | $2.24E+9 T^{(1.7)} \exp(-6139.3/T)$   | Vereecken and Peeters (2009)                                  |
| NPENTOB_I         | NPENTOB           | → HYDROXYKETONE + HO2                                     | $1.20E+11 \exp(-3825/T)$              | Atkinson (2007)                                               |
| usr_IPENTOB       | IPENTOB           | → CH3CHO + IC3H7O2                                        | $1.12E+9 T^{(1.7)} \exp(-4428.3/T)$   | Vereecken and Peeters (2009)                                  |
| NPENTOOHA_OH      | NPENTOOHA + OH    | → NPENTO2A + H2O                                          | $1.90E-12 \exp(190/T)$                | MCMv3.3.1                                                     |

|                    |                    |   |                                                  |                                         |                                                       |
|--------------------|--------------------|---|--------------------------------------------------|-----------------------------------------|-------------------------------------------------------|
| NPENTOOHA_OH_C     | NPENTOOHA + OH     | → | PENTANONE3 + H2O + OH                            | 2.73E-11                                | MCMv3.3.1                                             |
| NPENTOOHB_OH       | NPENTOOHB + OH     | → | NPENTO2B + H2O                                   | 1.90E-12 exp(190/T)                     | MCMv3.3.1                                             |
| NPENTOOHB_OH_C     | NPENTOOHB + OH     | → | PENTANONE2 + H2O + OH                            | 2.30E-11                                | MCMv3.3.1                                             |
| IPENTOOHA_OH       | IPENTOOHA + OH     | → | IPENTO2A + H2O                                   | 5.25E-12                                | MCMv3.3.1                                             |
| IPENTOOHB_OH       | IPENTOOHB + OH     | → | IPENTO2B + H2O                                   | 1.90E-12 exp(190/T)                     | MCMv3.3.1                                             |
| IPENTOOHB_OH_C     | IPENTOOHB + OH     | → | NELSON + H2O + OH                                | 2.29E-11                                | MCMv3.3.1                                             |
| PENTANOL3_OH       | PENTANOL3 + OH     | → | PENTANONE3 + HO2 + H2O                           | 1.30E-11                                | Calvert et al. (2015)                                 |
| PENTANOL2_OH       | PENTANOL2 + OH     | → | PENTANONE2 + HO2 + H2O                           | 1.10E-11                                | Calvert et al. (2015)                                 |
| IPENTOL_OH         | IPENTOL + OH       | → | CH3CHO + CH3COCH3 + HO2 + H2O                    | 2.00E-12 exp(160/T)                     | Calvert et al. (2015)                                 |
| M2BUTOL_OH         | M2BUTOL + OH       | → | NELSON + HO2 + H2O                               | 2.50E-12 exp(464/T)                     | Calvert et al. (2015)                                 |
| PENTANONE3_OH      | PENTANONE3 + OH    | → | C2H5CO3 + CH3CHO + H2O                           | 2.00E-12                                | Calvert et al. (2015)                                 |
| PENTANONE2_OH      | PENTANONE2 + OH    | → | CH3CHO + CH2O + CH3CO3 + H2O                     | 3.80E-13 exp(705/T)                     | Calvert et al. (2015)                                 |
| NELSON_OH          | NELSON + OH        | → | CH3COCH3 + CH3CO3 + H2O                          | 1.45E-12 exp(219/T)                     | Calvert et al. (2015)                                 |
| ALKNIT_OH          | ALKNIT + OH        | → | H2O + NO2 + CH3CHO + 0.5*CH3COCH3 + 0.5*PROPANAL | 2.20E-12                                | Calvert et al. (2011)                                 |
| C <sub>6</sub>     |                    |   |                                                  |                                         |                                                       |
| C6ALKANES_OH       | C6ALKANES + OH     | → | C6ALKO2 + H2O                                    | 2.00E-11 exp(-350/T)                    | Calvert et al. (2015)<br>(Averaged from >=C6 Alkanes) |
| C6ALKO2_HO2        | C6ALKO2 + HO2      | → | C6ALKOOH                                         | 2.11E-13 exp(1300/T)                    | Wennberg et al. (2018)                                |
| usr_C6ALKO2_NOa    | C6ALKO2 + NO       | → | NO2 + 0.60*C6ALKOHO2 + 0.40*IPENTOB              | 2.70E-12 exp(360/T) * (1 - $\alpha$ )   | Jenkin et al. (2019)                                  |
| usr_C6ALKO2_NOon   | C6ALKO2 + NO       | → | ALKNIT                                           | 2.70E-12 exp(360/T) * $\alpha$          | Jenkin et al. (2019)                                  |
| C6ALKOOH_OH        | C6ALKOOH + OH      | → | C6ALKO2 + H2O                                    | 1.90E-12 exp(190/T)                     | MCMv3.3.1                                             |
| C6ALKOOH_OH_C      | C6ALKOOH + OH      | → | HYDROXYKETONE + OH + H2O                         | 3.53E-11                                | MCMv3.3.1                                             |
| C6ALKOHO2_HO2      | C6ALKOHO2 + HO2    | → | C6ALKOOH                                         | 2.26E-13 exp(1300/T)                    | Wennberg et al. (2018)                                |
| usr_C6ALKOHO2_NOa  | C6ALKOHO2 + NO     | → | NO2 + HYDROXYKETONE + HO2                        | 2.70E-12 exp(360/T) * (1 - $\alpha$ )   | Jenkin et al. (2019)                                  |
| usr_C6ALKOHO2_NOon | C6ALKOHO2 + NO     | → | ALKNIT                                           | 2.70E-12 exp(360/T) * $\alpha$          | Jenkin et al. (2019)                                  |
| usr_C6ALKOHO2      | C6ALKOHO2          | → | C6KETO2 + HO2                                    | 0.303 T <sup>^(3.39)</sup> exp(-5905/T) | Vereecken and Nozière (2020)                          |
| C6KETO2_OH         | C6KETO2 + OH       | → | C6ALKOHO2 + H2O                                  | 1.90E-12 exp(190/T)                     | MCMv3.3.1                                             |
| C6KETO2_OH_C       | C6KETO2 + OH       | → | C6DIKETONE + OH + H2O                            | 3.66E-11                                | MCMv3.3.1                                             |
| HYDROXYKETONE_OH   | HYDROXYKETONE + OH | → | C6DIKETONE + H2O + HO2                           | 2.20E-11                                | Calvert et al. (2011)                                 |
| C6DIKETONE_OH      | C6DIKETONE + OH    | → | H2O + 2*CH3CO3 + CO2 + CH2O                      | 1.49E-12 exp(-450/T)                    | Calvert et al. (2011)                                 |

1) For third body reactions, parameters are shown in this order: k<sub>0</sub>, n, k<sub>inf</sub>, m, f. See Sect. 2 and Table 2-1 in JPL19.

2) For decomposition reactions, equilibrium constant is presented.

3) RO<sub>2</sub> + CH<sub>3</sub>O<sub>2</sub> rates are estimated using the geometric mean of CH<sub>3</sub>O<sub>2</sub> + CH<sub>3</sub>O<sub>2</sub> and RO<sub>2</sub> + RO<sub>2</sub> reactions

4) Nitrate yield ( $\alpha$ ) is calculated based on the method presented by Jenkin et al. (2019).

**Table S2.** Photolytic reactions added in MOZART-T3 mechanism. Mechanism label denotes the reaction tag used in CAM-chem reaction files. Details can be found in Sect. 2.

| Mechanism label              | Molecule      |   | Products                                                                                |
|------------------------------|---------------|---|-----------------------------------------------------------------------------------------|
| C <sub>3</sub>               |               |   |                                                                                         |
| [jnc3h7ooh->.jch3ooh]        | NC3H7OOH      | → | PROPANAL + OH + HO2                                                                     |
| [jic3h7ooh->.jch3ooh]        | IC3H7OOH      | → | CH3COCH3 + OH + HO2                                                                     |
| [jppn->.jpan]                | PPN           | → | 0.6*C2H5CO3 + 0.6*NO2 + 0.4*C2H5O2 + 0.4*NO3 + 0.4*CO2                                  |
| [jpropanal->.2.0*jch3cho]    | PROPANAL      | → | C2H5O2 + HO2 + CO                                                                       |
| C <sub>4</sub>               |               |   |                                                                                         |
| [jnbupoooh->.jch3ooh]        | NBUPOOH       | → | NBUPO + OH                                                                              |
| [jnbuoooh->.jch3ooh]         | NBUOOH        | → | NBUO + OH                                                                               |
| [jtbuoooh->.jch3ooh]         | TBUOOH        | → | CH3O2 + CH3COCH3 + OH                                                                   |
| [jbutanal->.2.0*jch3cho]     | BUTANAL       | → | NC3H7O2 + HO2 + CO                                                                      |
| [johbutanal->.2.0*jch3cho]   | OHBUTANAL     | → | NC3H7O2 + HO2 + CO                                                                      |
| C <sub>5</sub>               |               |   |                                                                                         |
| [jnpentoooh->.jch3ooh]       | NPENTOOHA     | → | NPENTOA + OH                                                                            |
| [jnpentooohb->.jch3ooh]      | NPENTOOHB     | → | NPENTOB + OH                                                                            |
| [jipentoooh->.jch3ooh]       | IPENTOOHA     | → | CH3COCH3 + C2H5O2 + OH                                                                  |
| [jipentooohb->.jch3ooh]      | IPENTOOHB     | → | IPENTOB + OH                                                                            |
| [jpentanone3->.5.0*jacet]    | PENTANONE3    | → | C2H5CO3 + C2H5O2                                                                        |
| [jpentanone2->.5.0*jacet]    | PENTANONE2    | → | CH3CO3 + NC3H7O2                                                                        |
| [jnelson->.5.0*jacet]        | NELSON        | → | CH3CO3 + IC3H7O2                                                                        |
| [jalknit->.jch3ooh]          | ALKNIT        | → | NO2 + 0.2*PROPANAL + 0.5*C2H5O2 + 0.5*CH3CHO + 0.3*NC3H7O2 + 0.3*CH3COCH3 + 0.2*IC3H7O2 |
| C <sub>6</sub>               |               |   |                                                                                         |
| [jc6alkoooh->.jch3ooh]       | C6ALKOOH      | → | OH + HO2 + HYDROXYKETONE                                                                |
| [jc6ketooh->.jch3ooh]        | C6KETOOH      | → | OH + HO2 + C6DIKETONE                                                                   |
| [jhydroxyketone->.5.0*jacet] | HYDROXYKETONE | → | CH3CO3 + 2*CH2O + HO2 + CH3CHO                                                          |
| [jc6diketone->.10.0*jacet]   | C6DIKETONE    | → | 2*CH3CO3 + 2*CH2O                                                                       |

**Table S3.** C<sub>3</sub>-C<sub>6</sub> alkanes and their oxidation products used in this study. Species newly added in T3 are shown in **bold**. Species used only in T1/T2 are shown in *italic*. Species used across all mechanisms (T1/T2/T3) are shown in normal font.

| Species name         | Chemical Formula  | Description                                     |
|----------------------|-------------------|-------------------------------------------------|
| <b>C<sub>3</sub></b> |                   |                                                 |
| C3H8                 | C3H8              | propane                                         |
| <i>C3H7O2</i>        | <i>C3H7O2</i>     | <i>propyl peroxy radical</i>                    |
| <b>NC3H7O2</b>       | <b>C3H7O2</b>     | <b>n-propyl peroxy radical</b>                  |
| <b>IC3H7O2</b>       | <b>C3H7O2</b>     | <b>isopropyl peroxy radical</b>                 |
| CH3COCH3             | CH3COCH3          | acetone                                         |
| <b>PROPANAL</b>      | <b>C2H5CHO</b>    | <b>propanal</b>                                 |
| <b>PROPANOL</b>      | <b>C3H8O</b>      | <b>n-propanol</b>                               |
| <b>IPROPANOL</b>     | <b>C3H8O</b>      | <b>isopropanol</b>                              |
| <b>C2H5CO3</b>       | <b>C2H5CO3</b>    | <b>propionyl peroxy radical</b>                 |
| <i>C3H7OOH</i>       | <i>C3H7OOH</i>    | <i>propyl hydroperoxide</i>                     |
| <b>NC3H7OOH</b>      | <b>C3H7OOH</b>    | <b>n-propyl hydroperoxide</b>                   |
| <b>IC3H7OOH</b>      | <b>C3H7OOH</b>    | <b>isopropyl hydroperoxide</b>                  |
| CH3COOOH             | CH3COOOH          | peracetic acid                                  |
| CH3OOH               | CH3OOH            | methyl hydroperoxide                            |
| <b>PPN</b>           | <b>C2H5CO3NO2</b> | <b>peroxy propionyl nitrate</b>                 |
| <b>C<sub>4</sub></b> |                   |                                                 |
| <b>NBUTANE</b>       | <b>C4H10</b>      | <b>n-butane</b>                                 |
| <b>IBUTANE</b>       | <b>C4H10</b>      | <b>isobutane</b>                                |
| <b>NBUPO2</b>        | <b>C4H9O2</b>     | <b>1-butyl peroxy radical</b>                   |
| <b>NBUO2</b>         | <b>C4H9O2</b>     | <b>2-butyl peroxy radical</b>                   |
| <b>TBUO2</b>         | <b>C4H9O2</b>     | <b>t-butyl peroxy radical</b>                   |
| <b>NBUPOOH</b>       | <b>C4H10O2</b>    | <b>n-butyl hydroperoxide</b>                    |
| <b>NBUOOH</b>        | <b>C4H10O2</b>    | <b>s-butyl hydroperoxide</b>                    |
| <b>TBUOOH</b>        | <b>C4H10O2</b>    | <b>t-butyl hydroperoxide</b>                    |
| <b>NBUPO</b>         | <b>C4H9O</b>      | <b>n-butoxy radical</b>                         |
| <b>NBUO</b>          | <b>C4H9O</b>      | <b>s-butoxy radical</b>                         |
| <b>BUTANAL</b>       | <b>C4H8O</b>      | <b>butanal</b>                                  |
| <i>MEK</i>           | <i>C4H8O</i>      | <i>methyl ethyl ketone</i>                      |
| <b>BUTOL2</b>        | <b>C4H10O</b>     | <b>2-butanol</b>                                |
| <b>TBUOH</b>         | <b>C4H10O</b>     | <b>t-butanol</b>                                |
| <b>NBUPOHO2</b>      | <b>C4H9O3</b>     | <b>4-hydroxy butyl peroxy radical</b>           |
| <b>OHBUTANAL</b>     | <b>C4H8O2</b>     | <b>4-hydroxy butanal</b>                        |
| <b>C<sub>5</sub></b> |                   |                                                 |
| <i>BIGALK</i>        | <i>C5H12</i>      | <i>lumped alkanes (≥C<sub>4</sub>)</i>          |
| <b>NPENTANE</b>      | <b>C5H12</b>      | <b>n-pentane</b>                                |
| <b>IPENTANE</b>      | <b>C5H12</b>      | <b>isopentane</b>                               |
| <i>ALKO2</i>         | <i>C5H11O2</i>    | <i>lumped alkane peroxy radical from BIGALK</i> |
| <b>NPENTO2A</b>      | <b>C5H11O2</b>    | <b>3-pentyl peroxy radical</b>                  |
| <b>NPENTO2B</b>      | <b>C5H11O2</b>    | <b>2-pentyl peroxy radical</b>                  |

|                      |           |                                                         |
|----------------------|-----------|---------------------------------------------------------|
| IPENTO2A             | C5H11O2   | t-pentyl peroxy radical                                 |
| IPENTO2B             | C5H11O2   | 3-methyl-2-butyl peroxy radical                         |
| ALKOOH               | C5H12O2   | <i>lumped alkane hydroperoxide</i>                      |
| NPENTOOHA            | C5H12O2   | 3-hydroperoxy pentane                                   |
| NPENTOOHB            | C5H12O2   | 2-hydroperoxy pentane                                   |
| IPENTOOHA            | C5H12O2   | 1,1-dimethylpropyl hydroperoxide                        |
| IPENTOOHB            | C5H12O2   | 2-hydroperoxy-3-methyl butane                           |
| NPENTOA              | C5H11O    | 3-pentoxy radical                                       |
| NPENTOB              | C5H11O    | 2-pentoxy radical                                       |
| IPENTOB              | C5H11O    | 3-methyl 2-butyl alkoxy radical                         |
| PENTANONE3           | C5H10O    | 3-pentanone                                             |
| PENTANONE2           | C5H10O    | 2-pentanone                                             |
| NELSON               | C5H10O    | methyl isopropyl ketone                                 |
| PENTANOL3            | C5H12O    | 3-pentanol                                              |
| PENTANOL2            | C5H12O    | 2-pentanol                                              |
| IPENTOL              | C5H12O    | t-pentyl alcohol                                        |
| M2BUTOL              | C5H12O    | 2-methyl-3-butanol                                      |
| ALKNIT               | C5H11ONO2 | <i>lumped alkyl nitrates</i>                            |
| <b>C<sub>6</sub></b> |           |                                                         |
| C6ALKANES            | C6H14     | <b>lumped alkanes (≥C<sub>6</sub>)</b>                  |
| C6ALKO2              | C6H13O2   | peroxy radical from C6ALKANES                           |
| C6ALKOOH             | C6H14O2   | <b>lumped hydroperoxide from C6ALKO2 + HO2</b>          |
| C6KETOOH             | C6H12O3   | 2-hydroperoxy-5-hexanone                                |
| C6ALKOHO2            | C6H13O3   | peroxy radical from C6ALKANES after H-shift             |
| HYDROXYKETONE        | C6H12O2   | <b>lumped hydroxyketones (2-hydroperoxy 5-hexanone)</b> |
| C6DIKETONE           | C6H10O2   | <b>lumped diketones (2,5-hexanedione)</b>               |

**Table S4.** Molecular weights, effective Henry's law constants, and reactivity factors (F0) for newly added species in T3.

| Species name   | Molecular weight (g mol <sup>-1</sup> ) | KH <sub>298</sub> (M atm <sup>-1</sup> ) | ΔH/R (K) | F0    | Reference                                                |
|----------------|-----------------------------------------|------------------------------------------|----------|-------|----------------------------------------------------------|
| C <sub>3</sub> |                                         |                                          |          |       |                                                          |
| PROPANAL       | 58.079257                               | 1.00E+01                                 | 4330     | 0.1   | JPL19                                                    |
| PROPANOL       | 60.09055                                | 1.42E+02                                 | 7370     | 0.1   | JPL19                                                    |
| IPROPANOL      | 60.09055                                | 1.32E+02                                 | 7100     | 0.1   | JPL19                                                    |
| NC3H7OOH       | 76.094544                               | 2.34E+02                                 | 6014     | 0.1   | GROMHE (GECKO-A)                                         |
| IC3H7OOH       | 76.094544                               | 2.34E+02                                 | 6014     | 0.1   | GROMHE (GECKO-A)                                         |
| PPN            | 135.075639                              | 2.94E+00                                 | 5730     | 0.1   | JPL19 (same as PAN)                                      |
| C <sub>4</sub> |                                         |                                          |          |       |                                                          |
| NBUTANE        | 58.122351                               | 1.19E-03                                 | 3740     | 1E-36 | JPL19                                                    |
| IBUTANE        | 58.122351                               | 9.18E-04                                 | 3340     | 1E-36 | JPL19                                                    |
| NBUPOOH        | 90.121161                               | 1.78E+02                                 | 6014     | 0.1   | GROMHE (GECKO-A)                                         |
| NBUOOH         | 90.121161                               | 1.78E+02                                 | 6014     | 0.1   | GROMHE (GECKO-A)                                         |
| TBUOOH         | 90.121161                               | 1.78E+02                                 | 6014     | 0.1   | GROMHE (GECKO-A)                                         |
| BUTANAL        | 72.105875                               | 9.60E+00                                 | 6220     | 0.1   | JPL19                                                    |
| BUTOL2         | 74.121756                               | 1.11E+02                                 | 7095     | 0.1   | JPL19                                                    |
| TBUOH          | 74.121756                               | 7.05E+01                                 | 8310     | 0.1   | JPL19                                                    |
| OHBUTANAL      | 88.105279                               | 3.24E+05                                 | 6014     | 1     | GROMHE (GECKO-A)                                         |
| C <sub>5</sub> |                                         |                                          |          |       |                                                          |
| NPENTANE       | 72.148969                               | 8.11E-04                                 | 3400     | 1E-36 | Sander (2015); Abraham and Matteoli (1988)               |
| IPENTANE       | 72.148969                               | 7.34E-04                                 | 6014     | 1E-36 | Sander (2015); Mackay and Shiu (1981)                    |
| NPENTOOHA      | 104.147778                              | 1.35E+02                                 | 6014     | 0.1   | GROMHE (GECKO-A)                                         |
| NPENTOOHB      | 104.147778                              | 1.35E+02                                 | 6014     | 0.1   | GROMHE (GECKO-A)                                         |
| IPENTOOHA      | 104.147778                              | 1.35E+02                                 | 6014     | 0.1   | GROMHE (GECKO-A)                                         |
| IPENTOOHB      | 104.147778                              | 1.35E+02                                 | 6014     | 0.1   | GROMHE (GECKO-A)                                         |
| PENTANONE3     | 86.132492                               | 1.62E+01                                 | 5600     | 0.1   | Sander (2015); Ji and Evans (2007)                       |
| PENTANONE2     | 86.132492                               | 1.62E+01                                 | 5700     | 0.1   | Sander (2015); Ji and Evans (2007)                       |
| NELSON         | 86.132492                               | 8.82E+00                                 | 5700     | 0.1   | Sander (2015); Bagno et al. (1991)                       |
| PENTANOL3      | 88.148373                               | 6.38E+01                                 | 7900     | 0.1   | Sander (2015); Cabani et al. (1975)                      |
| PENTANOL2      | 88.148373                               | 6.79E+01                                 | 7600     | 0.1   | Sander (2015); Butler et al. (1935); Kühne et al. (2005) |
| IPENTOL        | 88.148373                               | 7.19E+01                                 | 7600     | 0.1   | Sander (2015); Butler et al. (1935); Kühne et al. (2005) |
| M2BUTOL        | 88.148373                               | 7.19E+01                                 | 7600     | 0.1   | Sander (2015); Butler et al. (1935); Kühne et al. (2005) |
| C <sub>6</sub> |                                         |                                          |          |       |                                                          |
| C6ALKANES      | 86.175586                               | 6.18E-04                                 | 3800     | 1E-36 | Sander (2015); Abraham and Matteoli (1988)               |
| C6ALKOOH       | 118.16542                               | 1.02E+02                                 | 6014     | 0.1   | GROMHE (GECKO-A)                                         |
| C6KETOOH       | 132.157919                              | 5.50E+05                                 | 6014     | 1     | GROMHE (GECKO-A)                                         |
| HYDROXYKETONE  | 116.158514                              | 2.75E+05                                 | 6014     | 1     | GROMHE (GECKO-A)                                         |
| C6DIKETONE     | 114.142633                              | 4.37E+04                                 | 6014     | 1     | GROMHE (GECKO-A)                                         |

**Table S5.** Kinetic and photolysis reactions updated or added in T1.3 relative to T1.2. Bold values indicate updated reaction rate constants or branching ratios. Note that some reactions unrelated to alkane chemistry are also included, as they were incorporated from separate ongoing development of the T1.3 mechanism.

5

| Mechanism label    | Reactants      |   | Products                                                                                 | Rate                          | Updated/Added |
|--------------------|----------------|---|------------------------------------------------------------------------------------------|-------------------------------|---------------|
| Photolysis         |                |   |                                                                                          |                               |               |
| [jmek->,5.0*jacet] | MEK            | → | CH3CO3 + C2H5O2                                                                          | jacet                         | Updated       |
| Kinetics           |                |   |                                                                                          |                               |               |
| CH3O2_NO3          | CH3O2 + NO3    | → | CH2O + NO2 + HO2                                                                         | 8.9E-12 exp(-600/T)           | Added         |
| C2H5O2_NO3         | C2H5O2 + NO3   | → | CH3CHO + NO2 + HO2                                                                       | 8.9E-12 exp(-390/T)           | Added         |
| CH3CO3_HO2         | CH3CO3 + HO2   | → | <b>0.36*</b> CH3COOOH + 0.15*CH3COOH +<br>0.15*O3 + <b>0.49*</b> OH + <b>0.49*</b> CH3O2 | 4.2E-13 exp(1040/T)           | Updated       |
| CH3CO3_NO3         | CH3CO3 + NO3   | → | CH3O2 + CO2 + NO2                                                                        | 8.9E-12 exp(-305/T)           | Added         |
| C3H7O2_CH3O2       | C3H7O2 + CH3O2 | → | CH2O + HO2 + 0.82*CH3COCH3                                                               | <b>1.0E-13 exp(557/T)</b>     | Updated       |
| C3H7O2_HO2         | C3H7O2 + HO2   | → | C3H7OOH + O2                                                                             | <b>1.41E-13 exp(1300/T)</b>   | Updated       |
| C3H7O2_NO          | C3H7O2 + NO    | → | 0.82*CH3COCH3 + NO2 + HO2 +<br>0.27*CH3CHO                                               | <b>2.7E-12 exp(360/T)</b>     | Updated       |
| ALKNIT_OH          | ALKNIT + OH    | → | 0.4*CH2O + 0.8*CH3CHO +<br>0.8*CH3COCH3 + NO2                                            | <b>2.20E-12</b>               | Updated       |
| OH_HONO            | HONO + OH      | → | H2O + NO2                                                                                | 3E-12 exp(250/T)              | Added         |
| OH_NO_M            | OH + NO + M    | → | HONO + M                                                                                 | 7e-31, 2.6, 3.6e-11, 0.1, 0.6 | Added         |
| O1D_O3a            | O1D + O3       | → | O2 + 2*O                                                                                 | 1.20E-10                      | Added         |
| usr_NO2_aer        | NO2            | → | 0.5*OH + 0.5*NO + 0.5*HNO3                                                               | heterogeneous reaction        | Added         |

**Table S6.** Iso-to-normal (i/n) ratios for butanes and pentanes anthropogenic emissions used in this study. Ratios are calculated from average values shown in Table S7. Note that calculation methods based on continental averages versus global averaging from each study show minimal differences (<2%).

| i/n Ratio | Emission Sector |                   |       |
|-----------|-----------------|-------------------|-------|
|           | Transportation  | Industrial/Energy | Other |
| Butanes   | 0.482           | 0.523             | 0.564 |
| Pentanes  | 2.734           | 1.027             | 2.037 |

5

**Table S7.** Literature compilation of iso-to-normal (i/n) ratios and iso-fractions [i/(n+i)] for butanes and pentanes across different emission sectors and geographic regions. Some values are for report only and excluded from global averaging (Table S6) to prevent oversampling from similar sources or mixed emission signatures, as indicated by footnote markers.

| Sector                       | Region                                                                                        | Study                                   | Detail                                                           | i/n ratio |         | i/(n+i) |         |
|------------------------------|-----------------------------------------------------------------------------------------------|-----------------------------------------|------------------------------------------------------------------|-----------|---------|---------|---------|
|                              |                                                                                               |                                         |                                                                  | Butane    | Pentane | Butane  | Pentane |
| Transport                    | North America                                                                                 | California, US<br>Pang et al. (2014)    | 1995 Fleet tailpipe                                              | 0.647     | 3.070   | 0.393   | 0.754   |
|                              |                                                                                               |                                         | 1999 Fleet tailpipe                                              | 0.232     | 2.855   | 0.188   | 0.741   |
|                              |                                                                                               |                                         | 2001 Fleet tailpipe                                              | 0.132     | 2.764   | 0.117   | 0.734   |
|                              |                                                                                               |                                         | 2003 Fleet tailpipe                                              | 0.250     | 3.094   | 0.200   | 0.756   |
|                              |                                                                                               | Georgia, US<br>Conner et al. (1995)     | Roadway in Atlanta                                               | 0.273     | 3.248   | 0.214   | 0.765   |
|                              |                                                                                               |                                         | Weighted gasoline avg <sup>a</sup>                               | 0.185     | 2.670   | 0.156   | 0.728   |
|                              |                                                                                               |                                         | 87 Octane gasoline <sup>a</sup>                                  | 0.187     | 2.429   | 0.158   | 0.708   |
|                              |                                                                                               |                                         | 89 Octane gasoline <sup>a</sup>                                  | 0.188     | 2.920   | 0.158   | 0.745   |
|                              |                                                                                               | California, US<br>Gentner et al. (2013) | on-road                                                          | 0.094     | 3.894   | 0.086   | 0.796   |
|                              |                                                                                               |                                         | Fuel composition based <sup>a</sup>                              | 0.078     | 3.386   | 0.072   | 0.772   |
|                              | US cities (roadside)<br>Baker et al. (2008)                                                   | New York City                           | 1.412                                                            | 2.900     | 0.585   | 0.744   |         |
|                              |                                                                                               | Philadelphia                            | 0.800                                                            | 2.222     | 0.444   | 0.690   |         |
|                              |                                                                                               | Salt Lake City                          | 0.403                                                            | 1.935     | 0.287   | 0.659   |         |
|                              | Mexico<br>Araizaga et al. (2013)                                                              | Tunnel in Monterrey                     | 0.415                                                            | 1.816     | 0.293   | 0.645   |         |
|                              | Asia                                                                                          | South Korea<br>Simpson et al. (2020)    | Aircraft measurements over Seoul, below 500 m <sup>a</sup>       | 0.560     | 1.403   | 0.359   | 0.584   |
| China<br>Zhang et al. (2018) |                                                                                               | Tunnel in Guangzhou                     | 0.583                                                            | 2.205     | 0.368   | 0.688   |         |
|                              |                                                                                               | Tunnel in Beijing                       | 0.280                                                            | 2.962     | 0.219   | 0.748   |         |
|                              |                                                                                               | Tunnel in Tianjin<br>Song et al. (2020) | Tunnel in Tianjin                                                | 0.357     | 2.918   | 0.263   | 0.745   |
|                              |                                                                                               |                                         | Tunnel in Nanjing                                                | 0.942     | 3.644   | 0.485   | 0.785   |
|                              |                                                                                               | Tunnel in Hefei<br>Deng et al. (2018)   | Tunnel in Hefei                                                  | 0.442     | 5.096   | 0.307   | 0.836   |
|                              |                                                                                               | Tunnel in Hong Kong<br>Ho et al. (2009) | Tunnel in Hong Kong                                              | 0.632     | 3.294   | 0.387   | 0.767   |
| Taiwan<br>Hwa et al. (2002)  |                                                                                               | Tunnel in Taifei                        | 0.697                                                            | 1.313     | 0.411   | 0.568   |         |
| South America                |                                                                                               | Brazil                                  | Tunnel in Rio de Janeiro (Oct 2018)<br>Santos and Azevedo (2021) | 0.592     | 1.434   | 0.372   | 0.589   |
|                              |                                                                                               |                                         | Tunnel in Rio de Janeiro (May 2019)                              | 0.379     | 1.597   | 0.275   | 0.615   |
|                              | Urban background site in São Paulo (2013 annual mean) <sup>a</sup><br>Dominutti et al. (2016) |                                         | 0.497                                                            | 1.327     | 0.332   | 0.570   |         |

|  |               |                         |                                                                                                   |       |       |       |       |
|--|---------------|-------------------------|---------------------------------------------------------------------------------------------------|-------|-------|-------|-------|
|  |               |                         | Urban background site in São Paulo (summer, mean VOC/C <sub>2</sub> H <sub>2</sub> ) <sup>a</sup> | 0.641 | 1.290 | 0.391 | 0.563 |
|  |               | Dominutti et al. (2020) | Urban background site in São Paulo (summer, mean VOC/CO)                                          | 0.678 | 0.954 | 0.404 | 0.488 |
|  |               |                         | Urban background site in São Paulo (winter, mean VOC/C <sub>2</sub> H <sub>2</sub> ) <sup>a</sup> | 0.527 | 1.320 | 0.345 | 0.569 |
|  |               |                         | Urban background site in São Paulo (winter, mean VOC/CO)                                          | 0.600 | 1.154 | 0.375 | 0.536 |
|  |               | Martins et al. (2006)   | Tunnel in São Paulo                                                                               | 0.279 | -     | 0.218 | -     |
|  |               | Baudic et al. (2016)    | Urban background sites in Paris                                                                   | 0.585 | 2.154 | 0.369 | 0.683 |
|  | France        | Ammoura et al. (2014)   | Tunnel in Thiais                                                                                  | -     | 2.722 | -     | 0.731 |
|  |               |                         | Urban background site in Zurich (1993–1994)                                                       | 0.341 | 3.149 | 0.254 | 0.759 |
|  | Europe        | Lanz et al. (2008)      | Urban background site in Zurich (2005–2006)                                                       | 0.596 | 2.583 | 0.373 | 0.721 |
|  | Switzerland   | Stemmler et al. (2005)  | Tunnel near Zurich                                                                                | 0.346 | 3.875 | 0.257 | 0.795 |
|  |               | Ait-Helal et al. (2015) | Tunnel in Brussels                                                                                | 0.369 | 2.970 | 0.270 | 0.748 |
|  | Belgium       |                         | Saudi background                                                                                  | 0.409 | 2.643 | 0.290 | 0.726 |
|  |               | Simpson et al. (2014)   | Urban Mecca                                                                                       | 0.446 | 3.621 | 0.308 | 0.784 |
|  | Middle East   |                         | Pilgrimage route                                                                                  | 0.359 | 3.078 | 0.264 | 0.755 |
|  |               |                         | Tunnels in Mecca                                                                                  | 0.370 | 3.586 | 0.270 | 0.782 |
|  |               |                         | Tower near oil & natural gas operations in Erie; ratios from maximum observed values <sup>b</sup> | 0.462 | 0.877 | 0.316 | 0.467 |
|  |               | Gilman et al. (2013)    | Tower near oil & natural gas operations in Erie; ratios from mean observed values <sup>a</sup>    | 0.429 | 0.894 | 0.300 | 0.472 |
|  | Energy        |                         | Tower near oil & natural gas operations in Erie; ratios from mean observed values <sup>b</sup>    | 0.409 | 0.985 | 0.290 | 0.496 |
|  | North America |                         | Oil & natural gas in the Denver-Julesburg Basin during production activity                        | 0.382 | 0.769 | 0.276 | 0.435 |
|  |               | Hecobian et al. (2019)  | Night samples near wells; ratios from maximum observed values                                     | 0.687 | 1.222 | 0.407 | 0.550 |
|  |               | Swarthout et al. (2015) |                                                                                                   |       |       |       |       |

|                |                      |                                    |                                                                                                          |       |       |       |       |
|----------------|----------------------|------------------------------------|----------------------------------------------------------------------------------------------------------|-------|-------|-------|-------|
|                |                      |                                    | Night samples near wells;<br>ratios from mean observed<br>values <sup>a</sup>                            | 0.579 | 0.900 | 0.367 | 0.474 |
|                | Alberta,<br>Canada   | Simpson<br>et al.<br>(2010)        | Near oil sands; ratios from<br>maximum values                                                            | 0.379 | 1.106 | 0.275 | 0.525 |
|                | Arctic               | Gilman et<br>al. (2010)            | Arctic ship measurements of<br>air mass likely from natural<br>gas processing in Russia                  | 0.328 | 0.889 | 0.247 | 0.471 |
| Europe         |                      |                                    | Northern UK                                                                                              | 0.398 | 0.890 | 0.285 | 0.471 |
|                | The North<br>Sea     | Wilde et<br>al. (2021)             | Norwegian sector                                                                                         | 0.755 | 1.120 | 0.430 | 0.528 |
|                |                      |                                    | West Shetland                                                                                            | 0.665 | 1.080 | 0.399 | 0.519 |
|                |                      |                                    | Southern UK                                                                                              | 0.680 | 1.240 | 0.405 | 0.554 |
| All<br>general | 28 US cities<br>mean | Baker et<br>al. (2008)             | Well-ventilated areas<br>removed from roadsides such<br>as parks, schools and<br>cemeteries <sup>c</sup> | 0.606 | 2.262 | 0.377 | 0.693 |
|                | 16 US cities<br>mean | Rossabi<br>and<br>Helmig<br>(2018) | 10 PALMS <sup>d</sup> type 2 sites and 6<br>GGGRN <sup>e</sup><br>sites                                  | 0.522 | 1.811 | 0.343 | 0.644 |

<sup>a</sup> Values excluded from the calculation in Table S5 to avoid oversampling or when emission sources are suspected to be mixed for the measurement.

<sup>b</sup> Average values calculated first for measurements at the same site and time period before calculating the global average in Table S5.

<sup>c</sup> Roadside locations are excluded from this table.

5 <sup>d</sup> PALMS: Photochemical Assessment Monitoring Stations.

<sup>e</sup> GGGRN: Global Greenhouse Gas Reference Network.

**Table S8.** OVOC speciation profiles for anthropogenic emissions, including alcohols, aldehydes, and ketones across different MOZART chemical mechanism versions.

| OVOCs                               | CAM-chem Species | MOZART Mechanism <sup>a</sup> |             |             |
|-------------------------------------|------------------|-------------------------------|-------------|-------------|
|                                     |                  | T1.2                          | T1.3        | T3          |
| Alcohols<br>(VOC01-alcohols)        | CH3OH            | 0.15                          | 0.60 (0.50) | 0.60 (0.50) |
|                                     | C2H5OH           | 0.85                          | 0.40 (0.50) | 0.38 (0.48) |
|                                     | IPROPANOL        | N/A                           | N/A         | 0.02        |
| Aldehydes<br>(VOC22-other-alkanals) | CH3CHO           | 1.00                          | 1.00        | 0.85        |
|                                     | PROPANAL         | N/A                           | N/A         | 0.10        |
|                                     | BUTANAL          | N/A                           | N/A         | 0.05        |
| Ketones<br>(VOC23-ketones)          | CH3COCH3         | 0.20                          | 0.80        | 0.80        |
|                                     | MEK              | 0.80                          | 0.20        | 0.20        |

<sup>a</sup> The default "T1.2" values are from Emmons et al. (2020), and the updated "T1.3" and "T3" values are derived from the NSF NCAR Trace Organic Gas Analyzer (TOGA) measurements from multiple field campaigns over source regions, including the Front Range Air Pollution and Photochemistry Experiment (FRAPPÉ) (Flocke et al., 2020), the Wintertime Investigation of Transport, Emissions, and Reactivity (WINTER) (McDuffie et al., 2018), ATom (Thompson et al., 2022), the Asian Summer Monsoon Chemical and Climate Impact Project (ACCLIP) (Pan et al., 2025), and the Atmospheric Science and Chemistry mEasurement NeTwork (ASCENT) campaigns. Values represent global averages, with South American regional values shown in parentheses for alcohols.

**Table S9.** Scaling factors applied to BIGALK emissions to create speciated MOZART-T3 alkane emissions for biomass burning sources across different land cover types. Factors represent the fractional contribution of each alkane species to the total BIGALK emission category and sum to unity for each ecosystem.

| Species   | Tropical Forest | Savanna | Croplands | Boreal Forest | Temperate Forest |
|-----------|-----------------|---------|-----------|---------------|------------------|
| NBUTANE   | 0.47            | 0.39    | 0.35      | 0.34          | 0.34             |
| ISOBUTANE | 0.13            | 0.11    | 0.12      | 0.12          | 0.12             |
| NPENTANE  | 0.08            | 0.06    | 0.10      | 0.20          | 0.20             |
| IPENTANE  | 0.10            | 0.04    | 0.08      | 0.09          | 0.09             |
| C6ALKANES | 0.22            | 0.40    | 0.35      | 0.25          | 0.25             |

**Table S10.** Annual global budgets for ketone species including emissions (anthropogenic, biomass burning, and biogenic), chemical production and loss rates, dry and wet depositions, source totals (emission + chemical production) and loss totals (chemical loss + deposition), atmospheric burden, and atmospheric lifetime across different simulation cases. All emission, production, loss, and deposition values are in Tg yr<sup>-1</sup>, burden in Tg, and lifetime in days.

| Species  | Case         | Emission<br>(Anth.) | Emission<br>(BB) | Emission<br>(Biog.) | Chem.<br>Prod. | Chem.<br>Loss. | Dry<br>Dep. | Wet<br>Dep. | Emission<br>(All) | Source<br>(All) | Loss<br>(All) | Burden | Lifetime |
|----------|--------------|---------------------|------------------|---------------------|----------------|----------------|-------------|-------------|-------------------|-----------------|---------------|--------|----------|
| KETONE   | CEDS_T1.2    | 3.50                | 16.17            | 42.31               | 128.88         | 131.86         | 57.68       | 1.43        | 61.98             | 190.86          | 190.97        | 5.40   | 10.32    |
|          | CEDS_T1.3    | 3.08                | 16.17            | 42.26               | 129.41         | 132.18         | 56.77       | 1.40        | 61.51             | 190.92          | 190.35        | 5.09   | 9.77     |
|          | CEDS_T2.3    | 3.08                | 16.17            | 42.29               | 95.24          | 108.75         | 47.41       | 1.09        | 61.54             | 156.78          | 157.25        | 3.93   | 9.12     |
|          | CEDS_T1.3_T3 | 3.08                | 16.17            | 42.65               | 163.69         | 158.09         | 57.24       | 9.85        | 61.89             | 225.58          | 225.18        | 4.98   | 8.07     |
|          | CEDS_T2.3_T3 | 3.08                | 16.17            | 42.67               | 127.10         | 132.55         | 47.87       | 8.83        | 61.92             | 189.02          | 189.25        | 3.83   | 7.38     |
|          | CAMS_T1.2    | 7.60                | 16.17            | 42.34               | 116.02         | 123.04         | 57.87       | 1.41        | 66.11             | 182.13          | 182.32        | 5.26   | 10.53    |
|          | CAMS_T1.3    | 6.68                | 16.17            | 42.33               | 117.05         | 122.74         | 57.15       | 1.40        | 65.18             | 182.23          | 181.29        | 5.04   | 10.15    |
|          | CAMS_T2.3    | 6.68                | 16.17            | 42.34               | 82.42          | 99.21          | 47.77       | 1.09        | 65.18             | 147.60          | 148.08        | 3.86   | 9.51     |
|          | CAMS_T1.3_T3 | 6.68                | 16.17            | 42.71               | 149.06         | 147.09         | 57.71       | 9.39        | 65.55             | 214.62          | 214.19        | 4.88   | 8.32     |
|          | CAMS_T2.3_T3 | 6.68                | 16.17            | 42.75               | 112.32         | 121.50         | 48.32       | 8.36        | 65.59             | 177.92          | 178.17        | 3.72   | 7.63     |
| CH3COCH3 | CEDS_T1.2    | 0.59                | 5.63             | 42.31               | 83.57          | 84.38          | 46.04       | 1.27        | 48.53             | 132.10          | 131.69        | 4.59   | 12.73    |
|          | CEDS_T1.3    | 2.35                | 5.63             | 42.26               | 84.67          | 85.32          | 47.19       | 1.28        | 50.24             | 134.91          | 133.80        | 4.59   | 12.52    |
|          | CEDS_T2.3    | 2.35                | 5.63             | 42.29               | 51.88          | 63.20          | 37.90       | 0.98        | 50.27             | 102.15          | 102.07        | 3.44   | 12.29    |
|          | CEDS_T1.3_T3 | 2.35                | 5.63             | 42.26               | 87.47          | 87.44          | 48.34       | 1.32        | 50.25             | 137.71          | 137.10        | 4.73   | 12.58    |
|          | CEDS_T2.3_T3 | 2.35                | 5.63             | 42.29               | 55.43          | 65.52          | 39.07       | 1.02        | 50.27             | 105.70          | 105.61        | 3.58   | 12.38    |
|          | CAMS_T1.2    | 1.27                | 5.63             | 42.34               | 81.74          | 83.09          | 46.22       | 1.27        | 49.25             | 130.99          | 130.58        | 4.57   | 12.77    |
|          | CAMS_T1.3    | 5.10                | 5.63             | 42.33               | 83.18          | 85.19          | 48.30       | 1.30        | 53.06             | 136.24          | 134.80        | 4.63   | 12.53    |
|          | CAMS_T2.3    | 5.10                | 5.63             | 42.34               | 49.95          | 62.97          | 38.99       | 0.99        | 53.07             | 103.01          | 102.95        | 3.46   | 12.26    |
|          | CAMS_T1.3_T3 | 5.10                | 5.63             | 42.32               | 83.43          | 85.60          | 48.89       | 1.32        | 53.05             | 136.48          | 135.81        | 4.66   | 12.54    |
|          | CAMS_T2.3_T3 | 5.10                | 5.63             | 42.36               | 51.25          | 63.64          | 39.61       | 1.01        | 53.09             | 104.34          | 104.27        | 3.51   | 12.29    |
| MEK      | CEDS_T1.2    | 2.92                | 10.54            |                     | 45.31          | 47.48          | 11.64       | 0.16        | 13.45             | 58.76           | 59.28         | 0.80   | 4.94     |
|          | CEDS_T1.3    | 0.73                | 10.54            |                     | 44.75          | 46.85          | 9.58        | 0.12        | 11.26             | 56.01           | 56.55         | 0.50   | 3.25     |
|          | CEDS_T2.3    | 0.73                | 10.54            |                     | 43.36          | 45.55          | 9.51        | 0.11        | 11.26             | 54.63           | 55.18         | 0.49   | 3.26     |
|          | CEDS_T1.3_T3 | 0.73                | 10.54            |                     | 9.50           | 15.38          | 5.71        | 0.04        | 11.26             | 20.76           | 21.13         | 0.15   | 2.64     |
|          | CEDS_T2.3_T3 | 0.73                | 10.54            |                     | 9.49           | 15.39          | 5.70        | 0.04        | 11.26             | 20.75           | 21.12         | 0.15   | 2.63     |
|          | CAMS_T1.2    | 6.33                | 10.54            |                     | 34.28          | 39.95          | 11.65       | 0.14        | 16.86             | 51.14           | 51.74         | 0.69   | 4.86     |
|          | CAMS_T1.3    | 1.58                | 10.54            |                     | 33.87          | 37.54          | 8.85        | 0.10        | 12.12             | 45.99           | 46.49         | 0.41   | 3.25     |

|               |              |      |       |       |       |      |       |       |       |       |       |      |
|---------------|--------------|------|-------|-------|-------|------|-------|-------|-------|-------|-------|------|
|               | CAMS_T2.3    | 1.58 | 10.54 | 32.48 | 36.25 | 8.79 | 0.10  | 12.12 | 44.59 | 45.13 | 0.40  | 3.26 |
|               | CAMS_T1.3_T3 | 1.58 | 10.54 | 7.49  | 14.05 | 5.90 | 0.04  | 12.12 | 19.61 | 19.98 | 0.14  | 2.63 |
|               | CAMS_T2.3_T3 | 1.58 | 10.54 | 7.49  | 14.07 | 5.88 | 0.04  | 12.12 | 19.60 | 19.98 | 0.14  | 2.63 |
| PENTANONE2    | CEDS_T1.3_T3 |      |       | 2.38  | 2.33  | 0.05 | 0.002 |       | 2.38  | 2.38  | 0.01  | 1.41 |
|               | CEDS_T2.3_T3 |      |       | 2.38  | 2.32  | 0.05 | 0.002 |       | 2.38  | 2.38  | 0.01  | 1.41 |
|               | CAMS_T1.3_T3 |      |       | 0.89  | 0.86  | 0.02 | 0.001 |       | 0.89  | 0.89  | 0.00  | 1.68 |
|               | CAMS_T2.3_T3 |      |       | 0.89  | 0.86  | 0.02 | 0.001 |       | 0.89  | 0.89  | 0.00  | 1.69 |
| PENTANONE3    | CEDS_T1.3_T3 |      |       | 2.59  | 2.47  | 0.11 | 0.005 |       | 2.59  | 2.58  | 0.02  | 2.98 |
|               | CEDS_T2.3_T3 |      |       | 2.58  | 2.47  | 0.11 | 0.005 |       | 2.58  | 2.58  | 0.02  | 2.99 |
|               | CAMS_T1.3_T3 |      |       | 0.98  | 0.93  | 0.05 | 0.002 |       | 0.98  | 0.98  | 0.01  | 3.46 |
|               | CAMS_T2.3_T3 |      |       | 0.98  | 0.93  | 0.05 | 0.002 |       | 0.98  | 0.98  | 0.01  | 3.47 |
| NELSON        | CEDS_T1.3_T3 |      |       | 1.71  | 1.67  | 0.04 | 0.001 |       | 1.71  | 1.71  | 0.01  | 1.97 |
|               | CEDS_T2.3_T3 |      |       | 1.69  | 1.65  | 0.04 | 0.001 |       | 1.69  | 1.69  | 0.01  | 1.98 |
|               | CAMS_T1.3_T3 |      |       | 0.71  | 0.69  | 0.02 | 0.001 |       | 0.71  | 0.71  | 0.00  | 2.36 |
|               | CAMS_T2.3_T3 |      |       | 0.69  | 0.67  | 0.02 | 0.001 |       | 0.69  | 0.69  | 0.00  | 2.39 |
| HYDROXYKETONE | CEDS_T1.3_T3 |      |       | 25.09 | 20.81 | 0.98 | 3.28  |       | 25.09 | 25.07 | 0.02  | 0.27 |
|               | CEDS_T2.3_T3 |      |       | 22.86 | 18.98 | 0.94 | 2.91  |       | 22.86 | 22.84 | 0.02  | 0.26 |
|               | CAMS_T1.3_T3 |      |       | 23.10 | 19.00 | 0.89 | 3.19  |       | 23.10 | 23.08 | 0.02  | 0.27 |
|               | CAMS_T2.3_T3 |      |       | 20.85 | 17.15 | 0.86 | 2.82  |       | 20.85 | 20.83 | 0.02  | 0.27 |
| C6KETOOH      | CEDS_T1.3_T3 |      |       | 9.03  | 7.95  | 0.38 | 0.70  |       | 9.03  | 9.02  | 0.003 | 0.12 |
|               | CEDS_T2.3_T3 |      |       | 8.70  | 7.68  | 0.36 | 0.65  |       | 8.70  | 8.69  | 0.003 | 0.12 |
|               | CAMS_T1.3_T3 |      |       | 8.60  | 7.57  | 0.36 | 0.66  |       | 8.60  | 8.59  | 0.003 | 0.12 |
|               | CAMS_T2.3_T3 |      |       | 8.27  | 7.31  | 0.34 | 0.61  |       | 8.27  | 8.26  | 0.003 | 0.12 |
| C6DIKETONE    | CEDS_T1.3_T3 |      | 0.38  | 25.93 | 20.04 | 1.65 | 4.51  | 0.38  | 26.31 | 26.20 | 0.04  | 0.52 |
|               | CEDS_T2.3_T3 |      | 0.38  | 23.97 | 18.54 | 1.61 | 4.20  | 0.38  | 24.36 | 24.34 | 0.03  | 0.52 |
|               | CAMS_T1.3_T3 |      | 0.38  | 23.86 | 18.38 | 1.59 | 4.18  | 0.38  | 24.25 | 24.15 | 0.03  | 0.52 |
|               | CAMS_T2.3_T3 |      | 0.38  | 21.91 | 16.86 | 1.55 | 3.87  | 0.38  | 22.30 | 22.28 | 0.03  | 0.52 |

**Table S11.** Annual global budgets for aldehydes and organic nitrates including emissions (anthropogenic, biomass burning, and biogenic), chemical production and loss rates, dry and wet depositions, source totals (emission + chemical production) and loss totals (chemical loss + deposition), atmospheric burden, and atmospheric lifetime across different simulation cases. All emission, production, loss, and deposition values are in Tg yr<sup>-1</sup>, burden in Tg, and lifetime in days.

| Species  | Case         | Emission<br>(Anth.) | Emission<br>(BB) | Emission<br>(Biog.) | Chem.<br>Prod. | Chem.<br>Loss. | Dry<br>Dep. | Wet<br>Dep. | Emission<br>(All) | Source<br>(All) | Loss<br>(All) | Burden | Lifetime |
|----------|--------------|---------------------|------------------|---------------------|----------------|----------------|-------------|-------------|-------------------|-----------------|---------------|--------|----------|
| CH3CHO   | CEDS_T1.2    | 1.16                | 14.84            | 20.45               | 135.60         | 155.94         | 16.07       | 0.07        | 36.44             | 172.05          | 172.08        | 0.239  | 0.51     |
|          | CEDS_T1.3    | 1.16                | 14.84            | 20.40               | 134.70         | 155.16         | 15.93       | 0.07        | 36.40             | 171.10          | 171.15        | 0.225  | 0.48     |
|          | CEDS_T2.3    | 1.16                | 14.84            | 20.43               | 130.17         | 150.21         | 15.57       | 0.07        | 36.43             | 166.59          | 165.84        | 0.211  | 0.47     |
|          | CEDS_T1.3_T3 | 0.98                | 14.84            | 20.41               | 120.35         | 140.79         | 15.76       | 0.07        | 36.23             | 156.58          | 156.62        | 0.208  | 0.49     |
|          | CEDS_T2.3_T3 | 0.98                | 14.84            | 20.43               | 116.14         | 136.80         | 15.41       | 0.06        | 36.25             | 152.39          | 152.27        | 0.195  | 0.47     |
|          | CAMS_T1.2    | 9.33                | 14.84            | 20.48               | 135.11         | 161.44         | 18.33       | 0.08        | 44.65             | 179.76          | 179.85        | 0.251  | 0.51     |
|          | CAMS_T1.3    | 9.33                | 14.84            | 20.48               | 129.19         | 155.84         | 18.04       | 0.07        | 44.65             | 173.84          | 173.96        | 0.233  | 0.49     |
|          | CAMS_T2.3    | 9.33                | 14.84            | 20.47               | 124.56         | 150.74         | 17.69       | 0.07        | 44.64             | 169.21          | 168.50        | 0.218  | 0.47     |
|          | CAMS_T1.3_T3 | 7.93                | 14.84            | 20.47               | 117.05         | 142.72         | 17.58       | 0.07        | 43.24             | 160.28          | 160.38        | 0.216  | 0.49     |
|          | CAMS_T2.3_T3 | 7.93                | 14.84            | 20.50               | 112.89         | 138.75         | 17.22       | 0.07        | 43.27             | 156.16          | 156.03        | 0.203  | 0.47     |
| PROPANAL | CEDS_T1.3_T3 | 0.15                |                  |                     | 7.03           | 7.11           | 0.07        | 0.001       | 0.15              | 7.19            | 7.18          | 0.007  | 0.36     |
|          | CEDS_T2.3_T3 | 0.15                |                  |                     | 6.98           | 7.06           | 0.07        | 0.001       | 0.15              | 7.13            | 7.13          | 0.007  | 0.36     |
|          | CAMS_T1.3_T3 | 1.23                |                  |                     | 6.78           | 7.81           | 0.21        | 0.001       | 1.23              | 8.01            | 8.01          | 0.008  | 0.37     |
|          | CAMS_T2.3_T3 | 1.23                |                  |                     | 6.73           | 7.75           | 0.21        | 0.001       | 1.23              | 7.96            | 7.96          | 0.008  | 0.37     |
| BUTANAL  | CEDS_T1.3_T3 | 0.09                |                  |                     | 1.07           | 1.15           | 0.02        | 0.000       | 0.09              | 1.17            | 1.16          | 0.001  | 0.28     |
|          | CEDS_T2.3_T3 | 0.09                |                  |                     | 1.07           | 1.15           | 0.02        | 0.000       | 0.09              | 1.17            | 1.17          | 0.001  | 0.28     |
|          | CAMS_T1.3_T3 | 0.76                |                  |                     | 0.83           | 1.50           | 0.09        | 0.000       | 0.76              | 1.59            | 1.59          | 0.001  | 0.34     |
|          | CAMS_T2.3_T3 | 0.76                |                  |                     | 0.83           | 1.50           | 0.09        | 0.000       | 0.76              | 1.59            | 1.60          | 0.001  | 0.34     |
| PAN      | CEDS_T1.2    |                     |                  |                     | 971.6          | 966.9          | 5.23        | 0.024       | 0.0               | 971.6           | 972.1         | 2.282  | 0.86     |
|          | CEDS_T1.3    |                     |                  |                     | 1065.0         | 1059.0         | 5.85        | 0.024       | 0.0               | 1065.0          | 1064.9        | 2.330  | 0.80     |
|          | CEDS_T2.3    |                     |                  |                     | 1092.5         | 1086.3         | 5.76        | 0.024       | 0.0               | 1092.5          | 1092.1        | 2.239  | 0.75     |
|          | CEDS_T1.3_T3 |                     |                  |                     | 993.2          | 988.3          | 5.61        | 0.022       | 0.0               | 993.2           | 994.0         | 2.115  | 0.78     |
|          | CEDS_T2.3_T3 |                     |                  |                     | 1018.7         | 1013.3         | 5.52        | 0.022       | 0.0               | 1018.7          | 1018.9        | 2.029  | 0.73     |
|          | CAMS_T1.2    |                     |                  |                     | 986.7          | 981.8          | 5.37        | 0.023       | 0.0               | 986.7           | 987.2         | 2.217  | 0.82     |
|          | CAMS_T1.3    |                     |                  |                     | 1061.3         | 1055.2         | 5.87        | 0.023       | 0.0               | 1061.3          | 1061.1        | 2.226  | 0.77     |
|          | CAMS_T2.3    |                     |                  |                     | 1089.2         | 1083.0         | 5.78        | 0.022       | 0.0               | 1089.2          | 1088.8        | 2.135  | 0.72     |
|          | CAMS_T1.3_T3 |                     |                  |                     | 990.3          | 985.4          | 5.60        | 0.020       | 0.0               | 990.3           | 991.0         | 2.035  | 0.75     |
|          | CAMS_T2.3_T3 |                     |                  |                     | 1016.7         | 1011.3         | 5.52        | 0.020       | 0.0               | 1016.7          | 1016.8        | 1.951  | 0.70     |

|        |              |       |       |      |       |     |      |      |       |      |
|--------|--------------|-------|-------|------|-------|-----|------|------|-------|------|
| PPN    | CEDS_T1.3_T3 | 16.42 | 16.35 | 0.08 | 0.001 | 0.0 | 16.4 | 16.4 | 0.052 | 1.14 |
|        | CEDS_T2.3_T3 | 16.27 | 16.18 | 0.08 | 0.001 | 0.0 | 16.3 | 16.3 | 0.051 | 1.14 |
|        | CAMS_T1.3_T3 | 16.44 | 16.36 | 0.09 | 0.001 | 0.0 | 16.4 | 16.5 | 0.045 | 0.99 |
|        | CAMS_T2.3_T3 | 16.26 | 16.17 | 0.09 | 0.001 | 0.0 | 16.3 | 16.3 | 0.044 | 0.99 |
| ALKNIT | CEDS_T1.2    | 16.5  | 15.2  | 1.27 | 0.001 | 0.0 | 16.5 | 16.4 | 0.116 | 2.58 |
|        | CEDS_T1.3    | 16.5  | 15.4  | 1.15 | 0.001 | 0.0 | 16.5 | 16.5 | 0.098 | 2.16 |
|        | CEDS_T2.3    | 15.9  | 14.9  | 1.13 | 0.001 | 0.0 | 15.9 | 16.0 | 0.095 | 2.18 |
|        | CEDS_T1.3_T3 | 13.8  | 12.5  | 1.32 | 0.001 | 0.0 | 13.8 | 13.8 | 0.088 | 2.32 |
|        | CEDS_T2.3_T3 | 13.6  | 12.2  | 1.30 | 0.001 | 0.0 | 13.6 | 13.5 | 0.087 | 2.34 |
|        | CAMS_T1.2    | 12.3  | 11.2  | 0.98 | 0.001 | 0.0 | 12.3 | 12.2 | 0.089 | 2.67 |
|        | CAMS_T1.3    | 12.3  | 11.4  | 0.89 | 0.001 | 0.0 | 12.3 | 12.3 | 0.076 | 2.24 |
|        | CAMS_T2.3    | 11.7  | 10.9  | 0.88 | 0.001 | 0.0 | 11.7 | 11.8 | 0.073 | 2.27 |
|        | CAMS_T1.3_T3 | 11.1  | 10.0  | 1.08 | 0.001 | 0.0 | 11.1 | 11.1 | 0.071 | 2.35 |
|        | CAMS_T2.3_T3 | 10.9  | 9.8   | 1.06 | 0.001 | 0.0 | 10.9 | 10.8 | 0.070 | 2.37 |

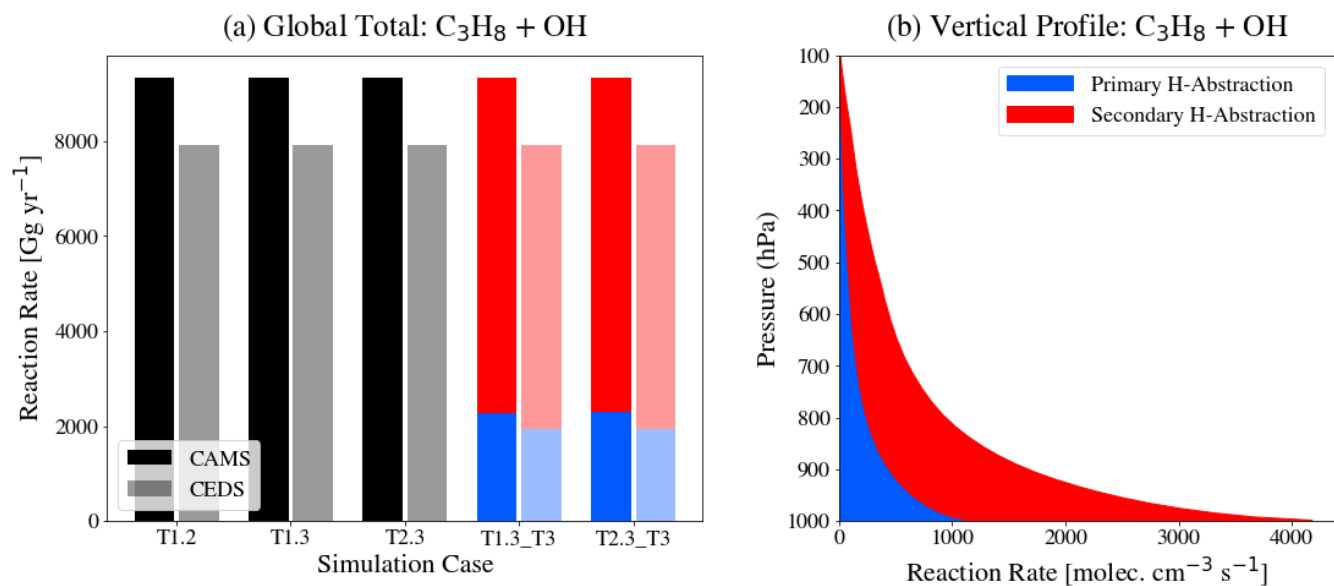

**Figure S1.** Annual global C<sub>3</sub>H<sub>8</sub> + OH reaction rates across different simulation cases. (a) Total reaction rates showing CAMS (black) and CEDS (gray) emission inventories, with T3 mechanisms displaying primary (blue) and secondary (red) carbon hydrogen abstraction pathways. (b) Vertical profile of reaction pathways for the CEDS\_T2.3\_T3 case.

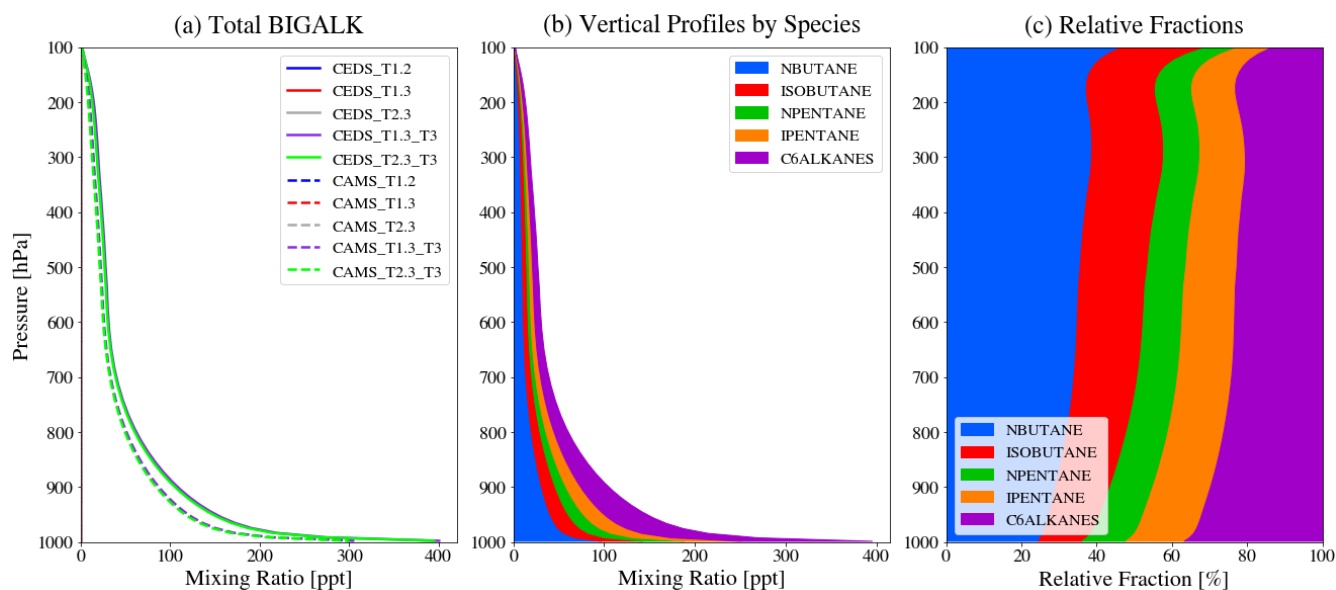

**Figure S2.** Vertical profiles of BIGALK species mixing ratios. (a) Total BIGALK across different mechanisms and emission inventories (solid lines: CEDS, dashed lines: CAMS). (b) Individual C<sub>4</sub>–C<sub>6</sub> alkane species contributions in the CEDS\_T2.3\_T3 case. (c) Relative fractions of each alkane species as a function of altitude.

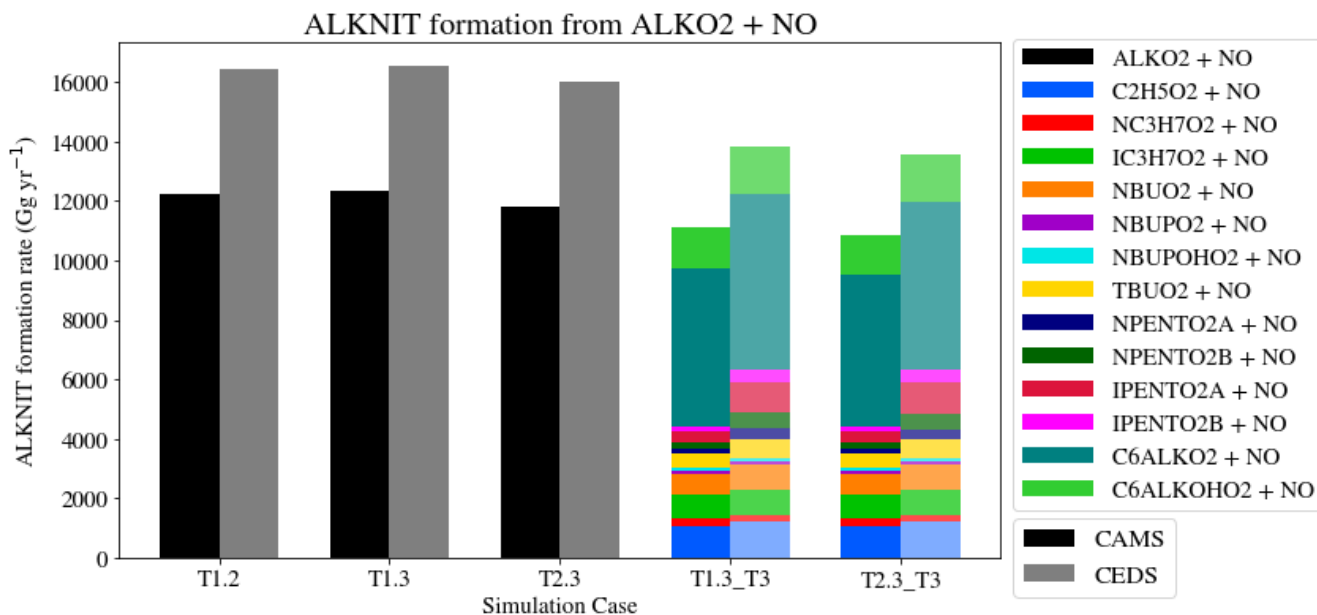

**Figure S3.** Annual total ALKNIT formation rates from alkyl RO<sub>2</sub> + NO reactions across different mechanism and emission inventory cases. Formation rates from individual peroxy radicals are normalized by their respective molecular weights and multiplied by ALKNIT molecular weight to enable direct mass flux comparison. T1 and T2 use lumped ALKO2 species (black), while T3 explicitly represents individual alkane-derived peroxy radicals (colored). Dark shading represents CAM5 inventory and light shading represents CED5 inventory cases.

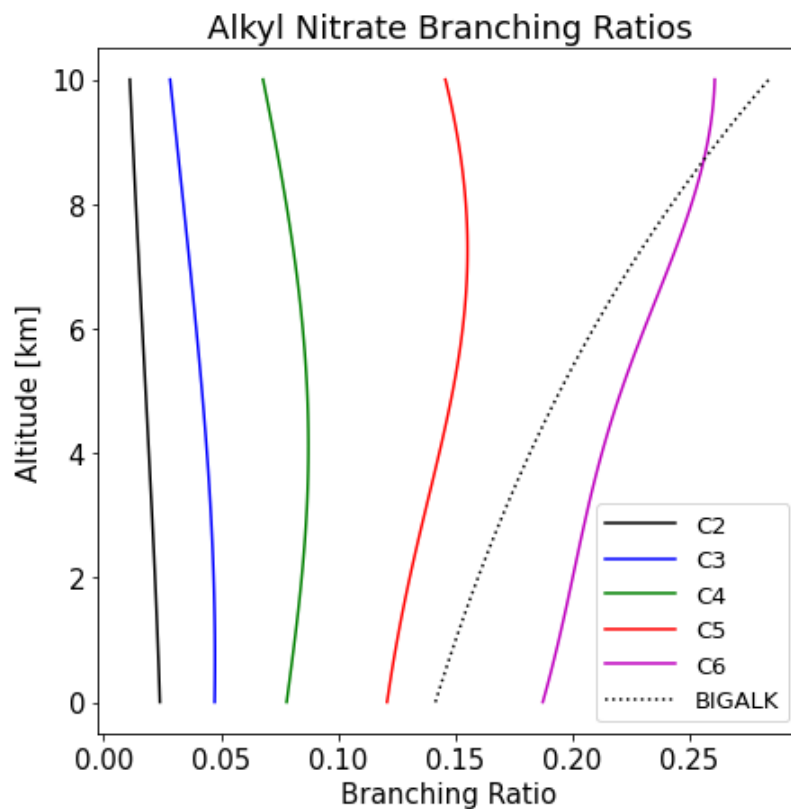

**Figure S4.** Altitude dependence of alkyl nitrate branching ratios from alkyl  $\text{RO}_2 + \text{NO}$  reactions. Solid lines show branching ratios for individual  $\text{C}_2$ – $\text{C}_6$  alkanes using the temperature and pressure dependent parameterization from Jenkin et al. (2019) implemented in T3. Dotted line shows the lumped BIGALK branching ratio in T1/T2, calculated from temperature-dependent rate constants (Emmons et al., 2020). Atmospheric temperature and pressure profiles are from the International Standard Atmosphere 1993.

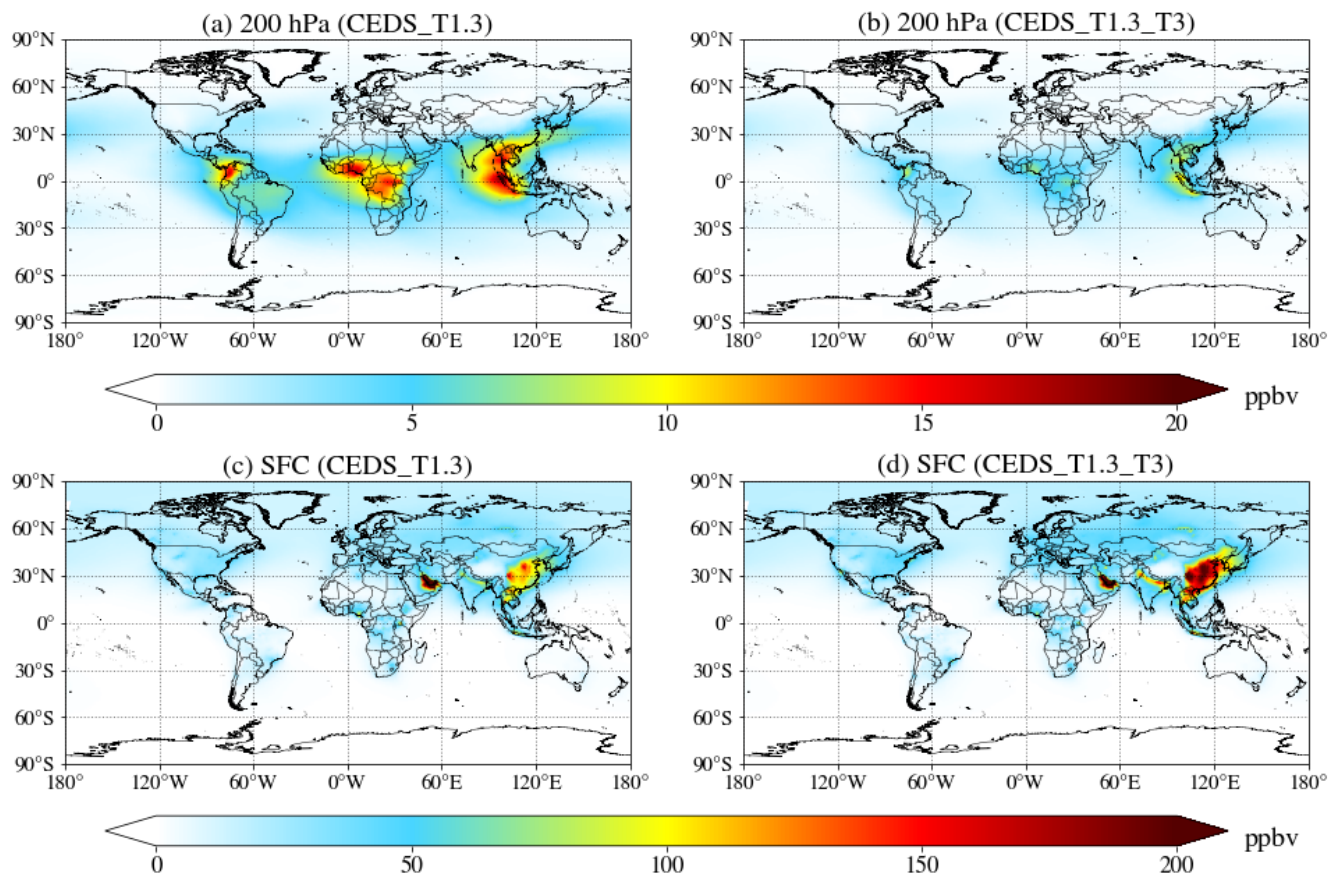

**Figure S5.** Annual mean ALKNIT mixing ratios at 200 hPa for (a) CEDs\_T1.3 and (b) CEDs\_T1.3\_T3, and at the surface for (c) CEDs\_T1.3 and (d) CEDs\_T1.3\_T3. Note the different color scales for upper troposphere (0-20 ppbv) and surface (0-200 ppbv).

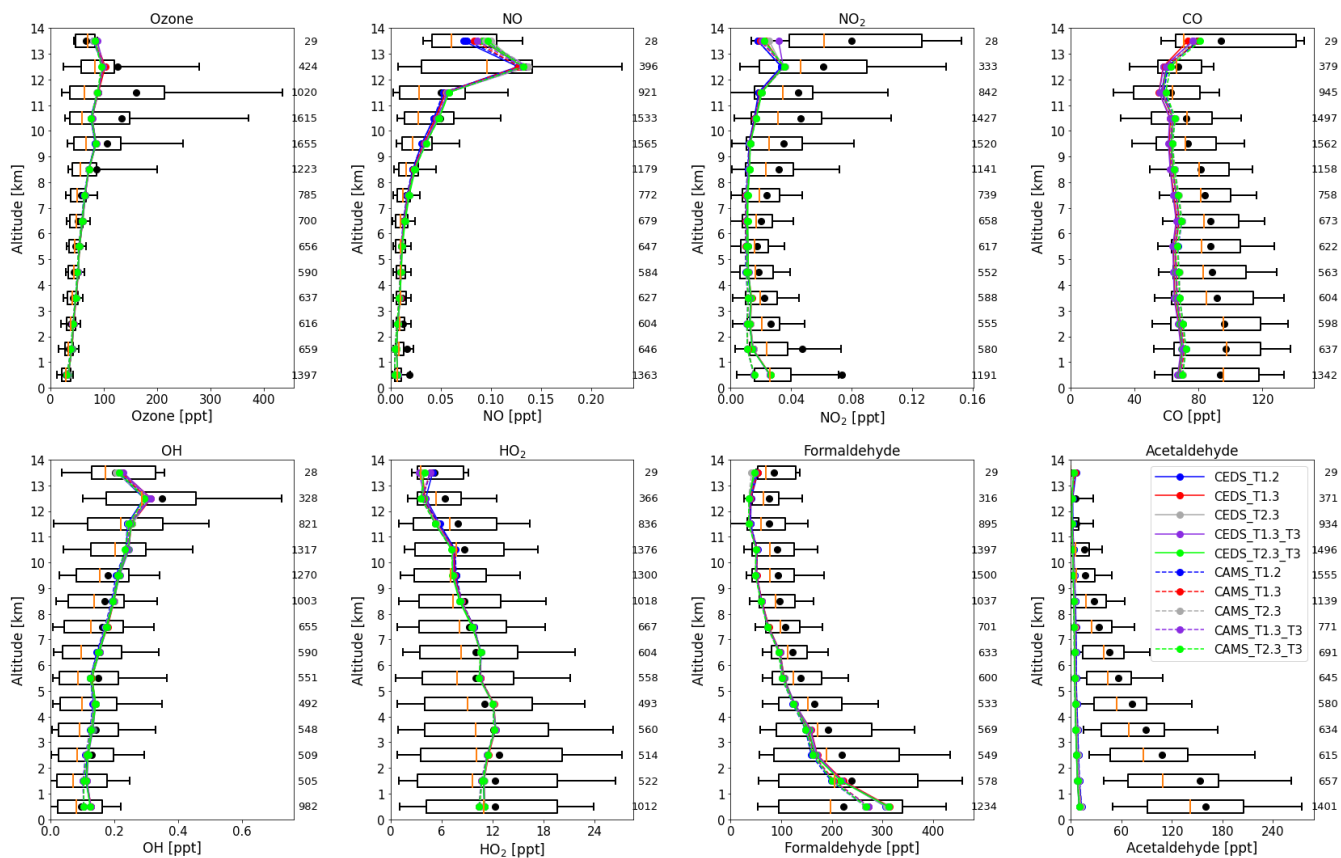

**Figure S6.** Vertical profiles of major air pollutants compared with ATom observations across all four campaigns (ATom-1 through ATom-4). Box-and-whisker plots show the distribution of ATom measurements at each altitude bin, with the box representing the interquartile range, the orange line indicating the median, and whiskers extending to the 10th and 90th percentiles. Black dots represent the mean of observations. Model median values from different mechanism and emission inventory combinations are shown as colored lines and symbols. Numbers on the right y-axis indicate the number of observations in each altitude bin.

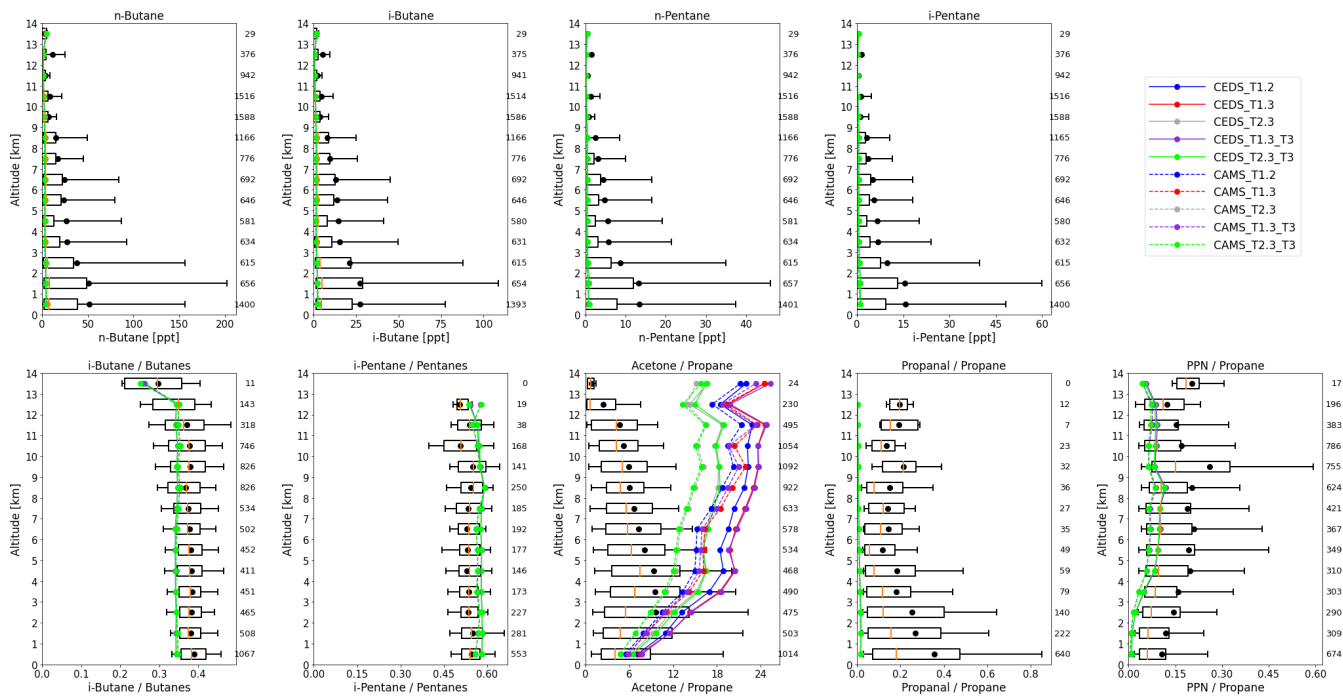

**Figure S7.** Same as Figure S6 but for explicit C<sub>4</sub>-C<sub>5</sub> alkane species (n-butane, i-butane, n-pentane, i-pentane), ratios of isomers to total alkanes (i-butane/butanes, i-pentane/pentanes), and OVOCs to parent hydrocarbons (acetone/propane, propanal/propane, PPN/propane).

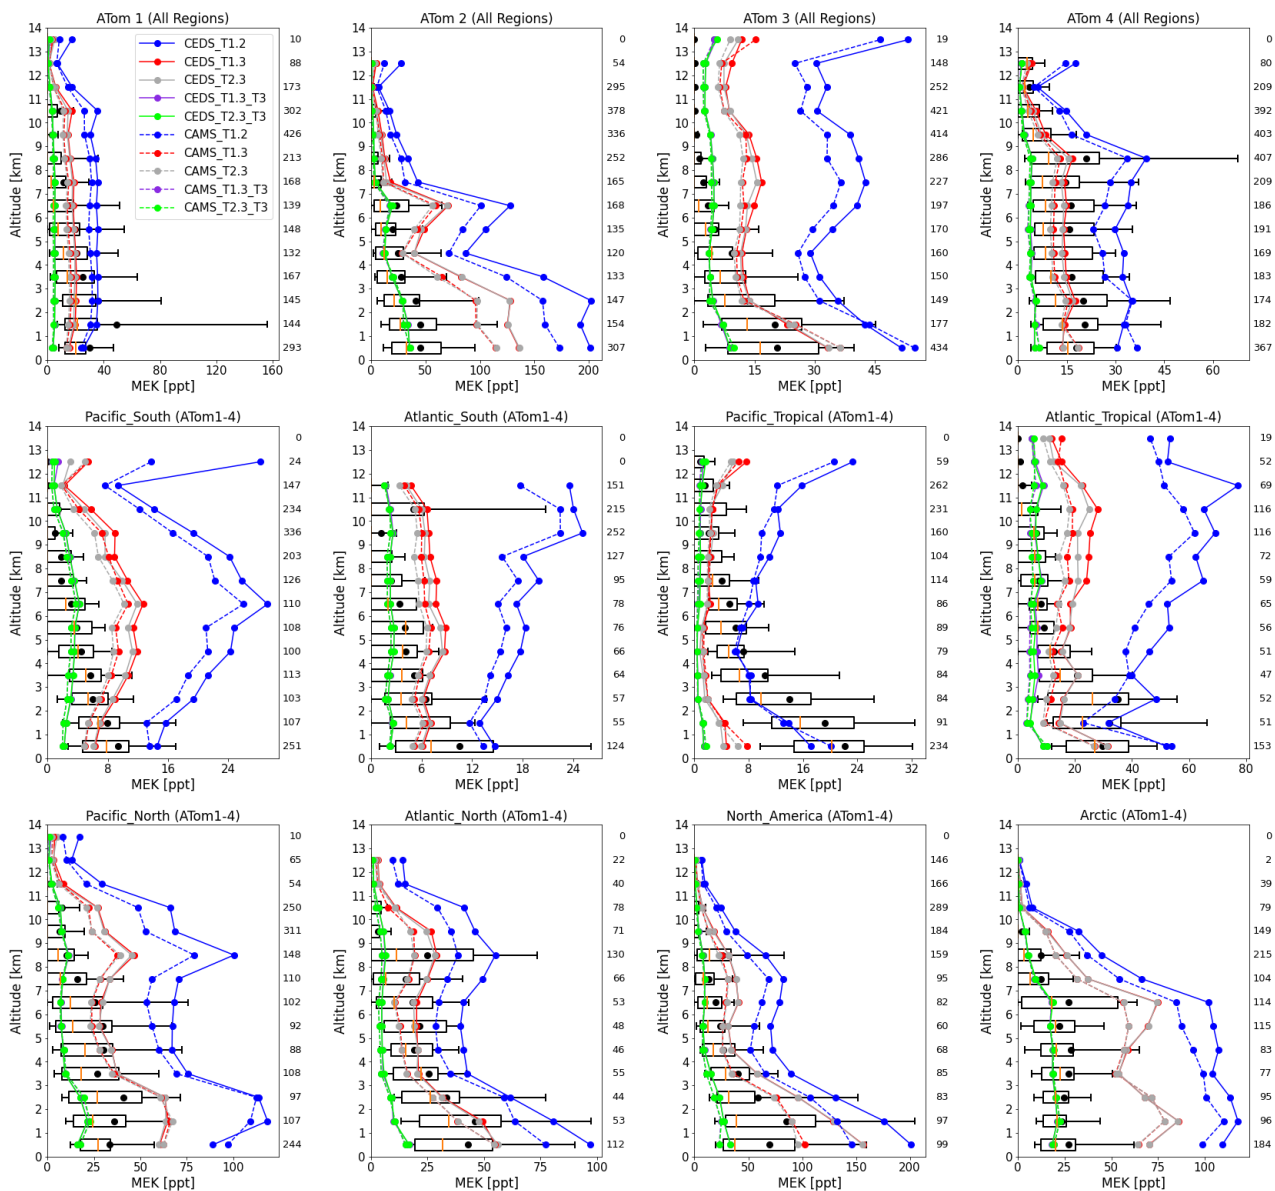

**Figure S8.** Vertical profiles of MEK for individual ATom campaigns (ATom-1 through ATom-4) and by region. Regional definitions are shown in Figure S9. Box-and-whisker plots show the distribution of ATom measurements at each altitude bin, with the box representing the interquartile range, the orange line indicating the median, and whiskers extending to the 10th and 90th percentiles. Black dots represent the mean of observations. Model median values from different mechanism and emission inventory combinations are shown as colored lines and symbols. Numbers on the right y-axis indicate the number of observations in each altitude bin.

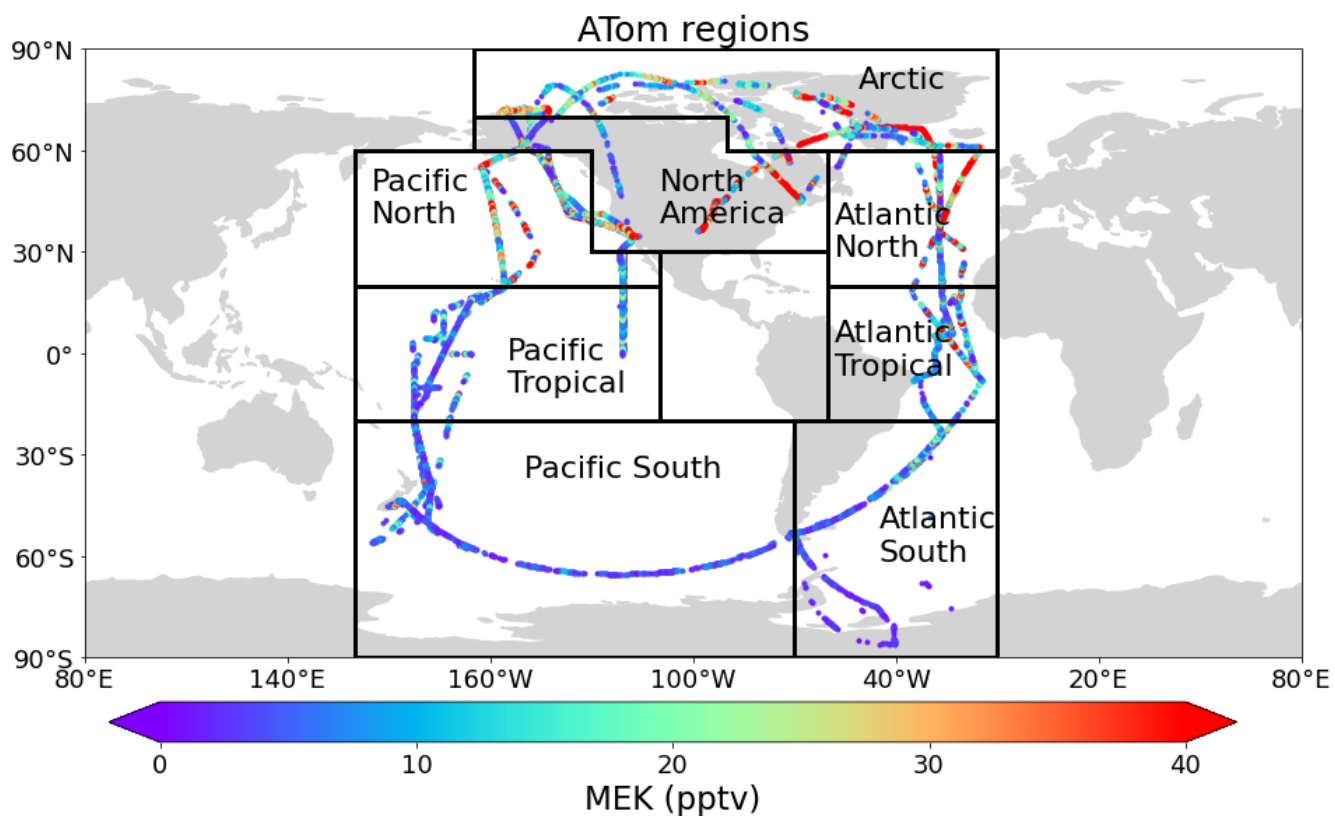

**Figure S9.** Spatial distribution of observed MEK concentrations along ATom flight tracks, divided into regional boxes. The color scale indicates MEK mixing ratios in pptv.

5

## References

- 10 References cited in this supplement are listed in the main text reference list.
